# Supplementary material for: Synthesis of Novel Derivatives of Carbazole-Thiophene, Their Electronic Properties, and Computational Studies
Source: Hindawi journal article supplement (doi:10.1155/2016/9360230), 2016-01-01
Supplement: f1 [file 9360230.f1.pdf]

# Supporting Information

## Synthesis Of Novel Derivatives Of Thiophene-Carbazole, Their Electronic Properties And Computational Studies

Damit E. F.,<sup>1</sup> Nordin N.,<sup>1</sup> Ariffin A.\*<sup>1</sup> and Sulaiman K.<sup>2</sup>

<sup>1</sup>Chemistry Department, Science Faculty, University of Malaya,

50603, Kuala Lumpur, Malaysia

<sup>2</sup>Physic Department, Science Faculty, University of Malaya,

50603, Kuala Lumpur, Malaysia

E-mail: [azhar70@um.edu.my](mailto:azhar70@um.edu.my)

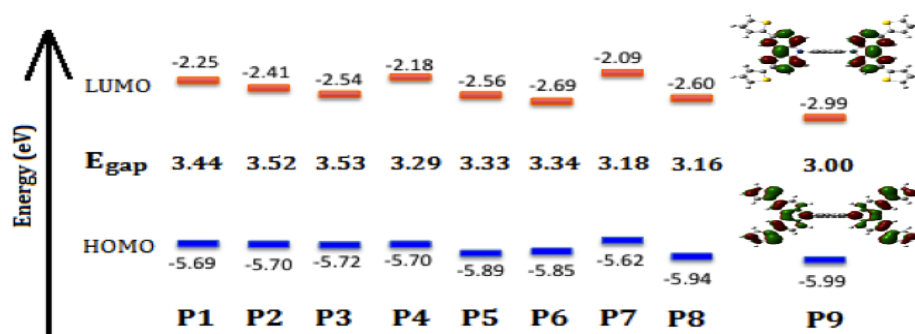

### Table of Contents

1. <sup>1</sup>H NMR and <sup>13</sup>C NMR (S2-S15)
2. Theoretical Calculations (S16- S33)

1.  $^1\text{H}$  NMR and  $^{13}\text{C}$  spectra in  $\text{CDCl}_3$  solution.

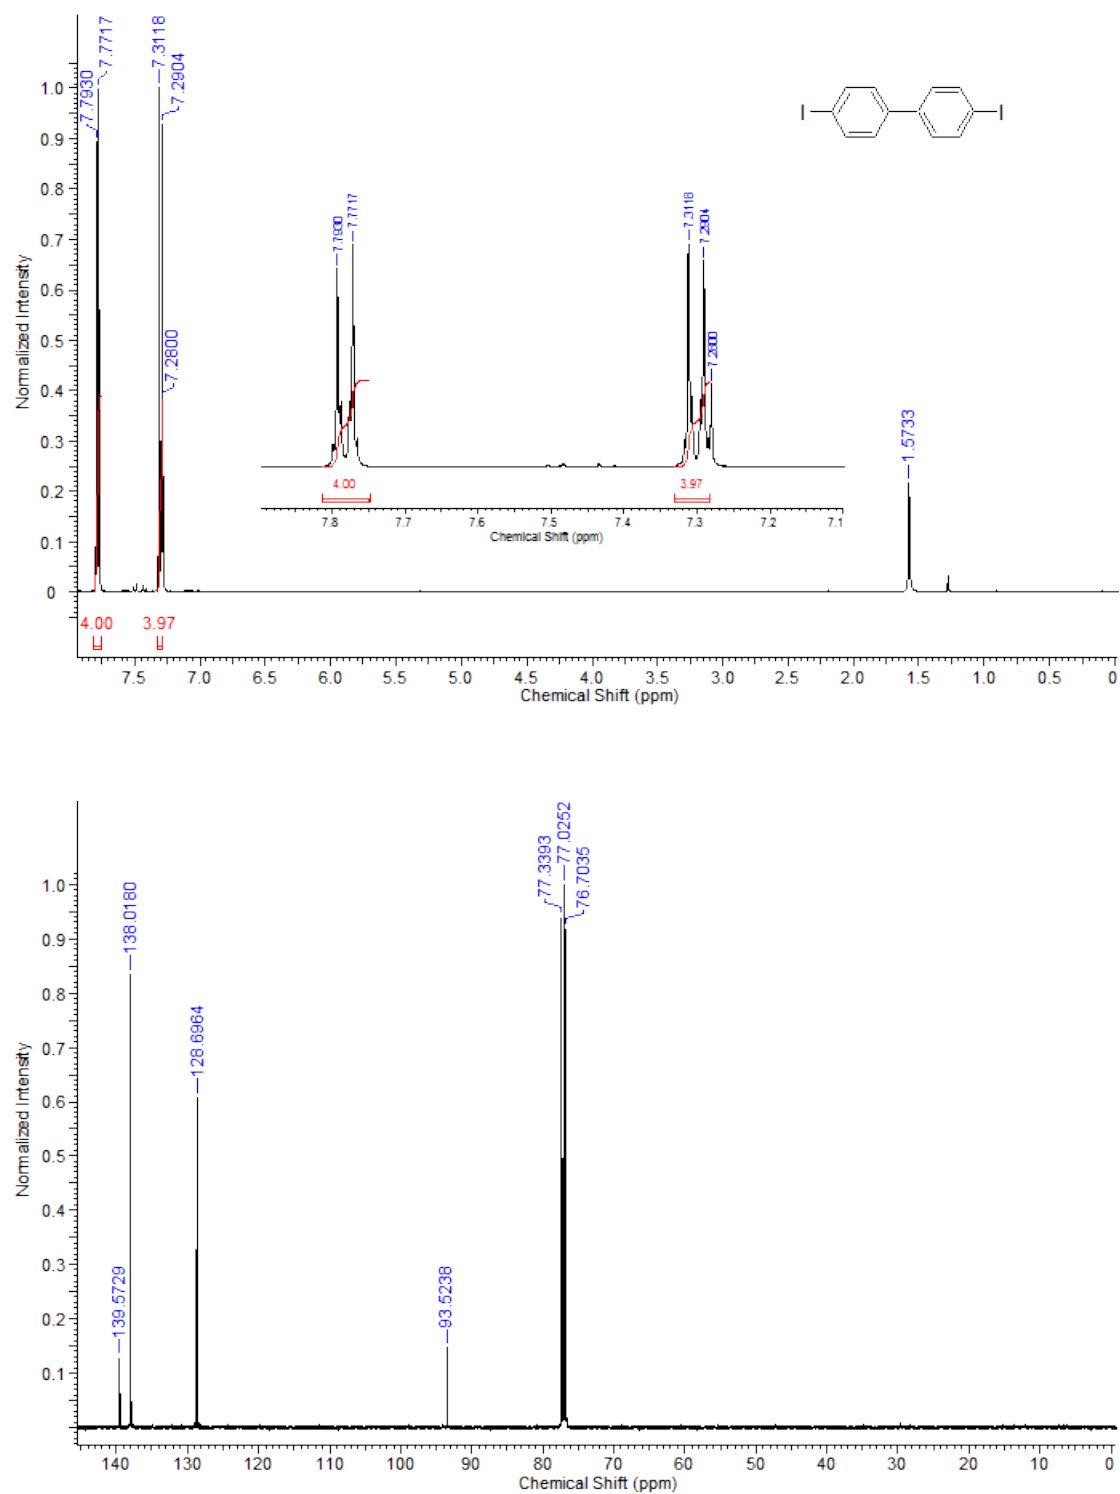

Figure S1.  $^1\text{H}$  NMR and  $^{13}\text{C}$  NMR of 4,4-diiodobiphenyl (2) in  $\text{CDCl}_3$ .

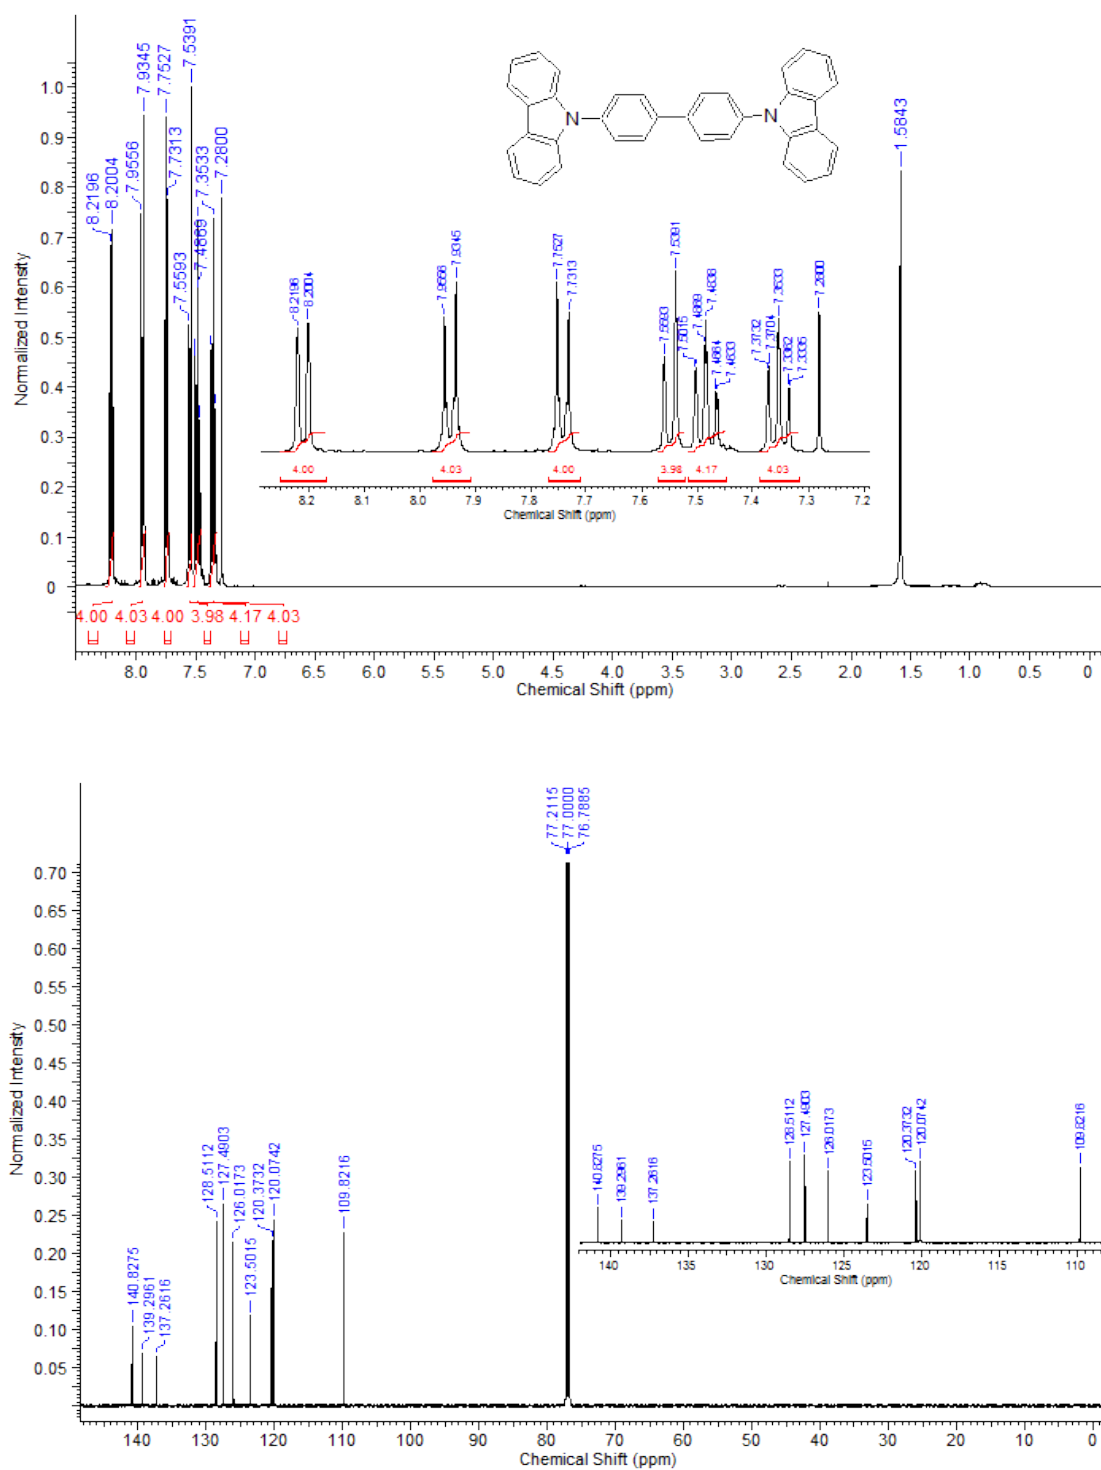

Figure S2. <sup>1</sup>H NMR and <sup>13</sup>C NMR of 4,4'-Di(9H-carbazol-9-yl)-1,1'-biphenyl (P1) in CDCl<sub>3</sub>.

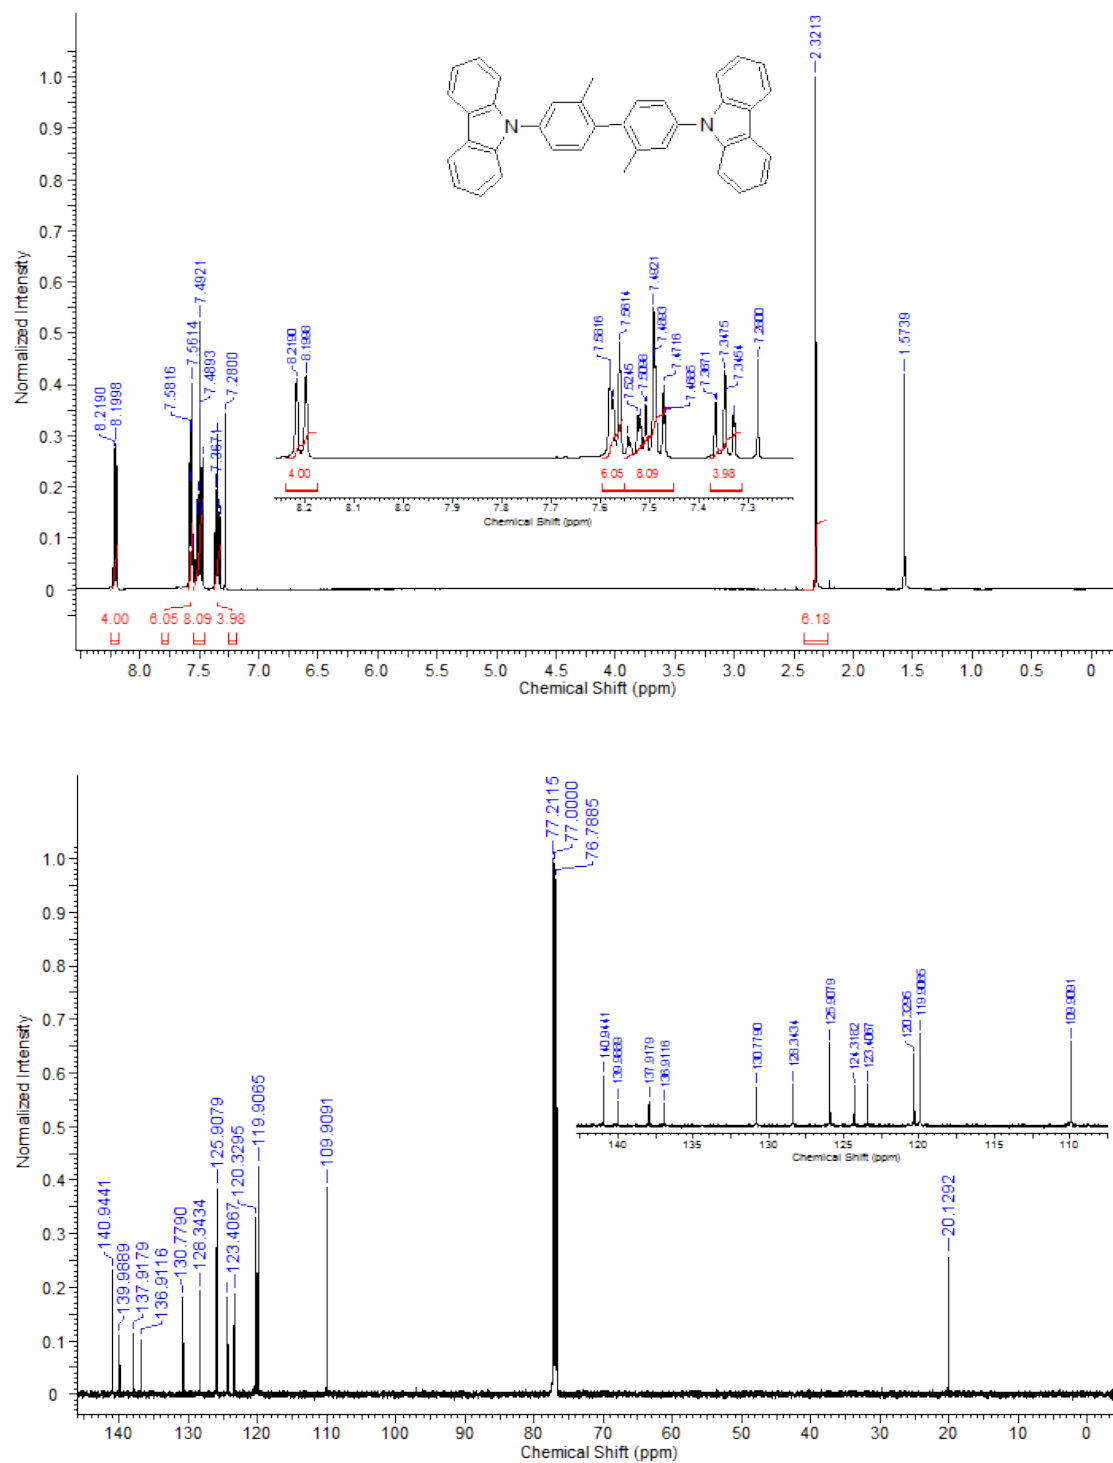

Figure S3. <sup>1</sup>H NMR and <sup>13</sup>C NMR of 9,9'-(2,2'-dimethyl-[1,1'-biphenyl]-4,4'-diyl)bis(9H-carbazole) (P2) in CDCl<sub>3</sub>.

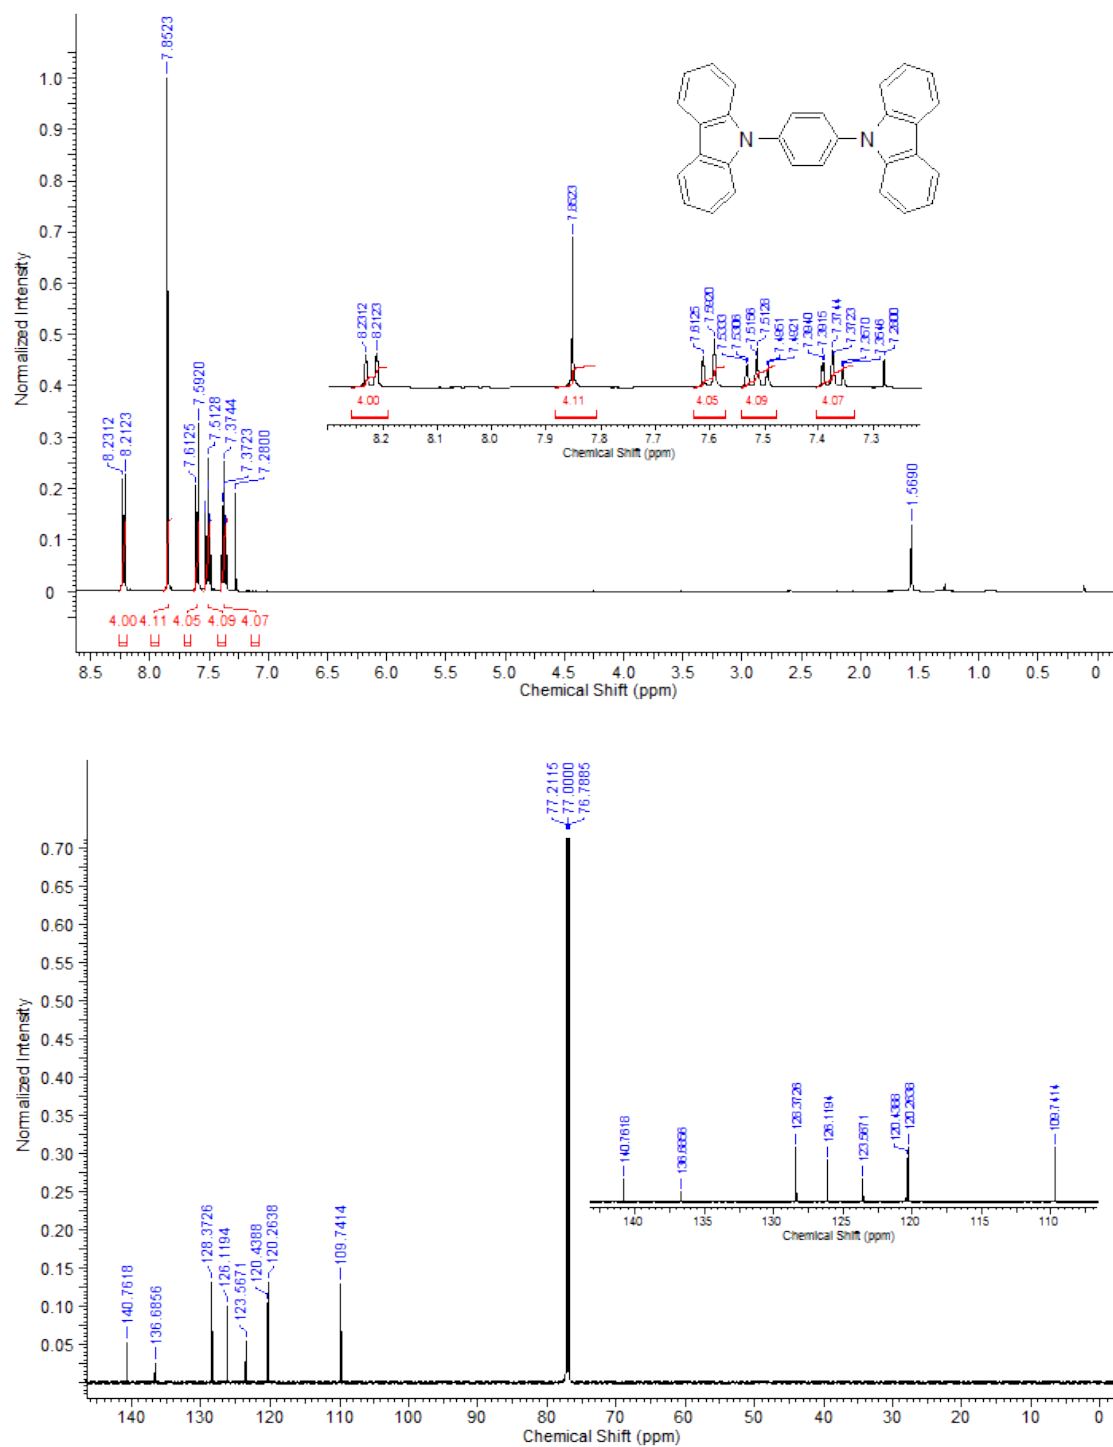

Figure S4. <sup>1</sup>H NMR and <sup>13</sup>C NMR of 1,4-di(9H-carbazol-9-yl)benzene (P3) in CDCl<sub>3</sub>.

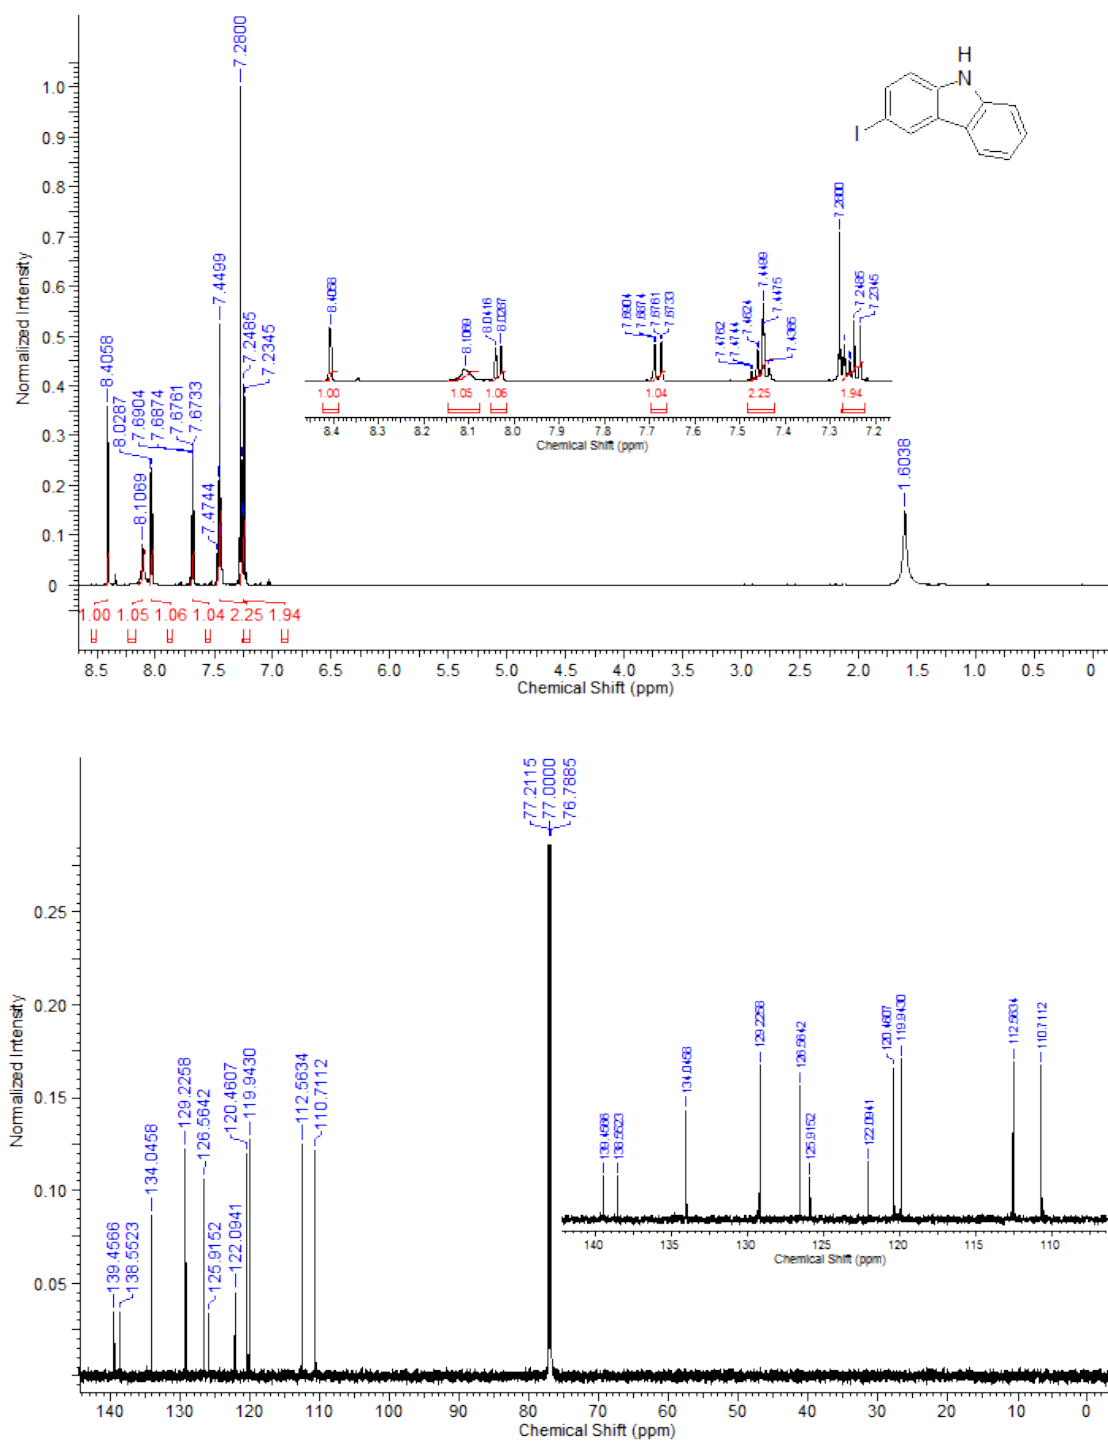

Figure S5. <sup>1</sup>H NMR and <sup>13</sup>C NMR of 3-Diiodocarbazole (5) in CDCl<sub>3</sub>.

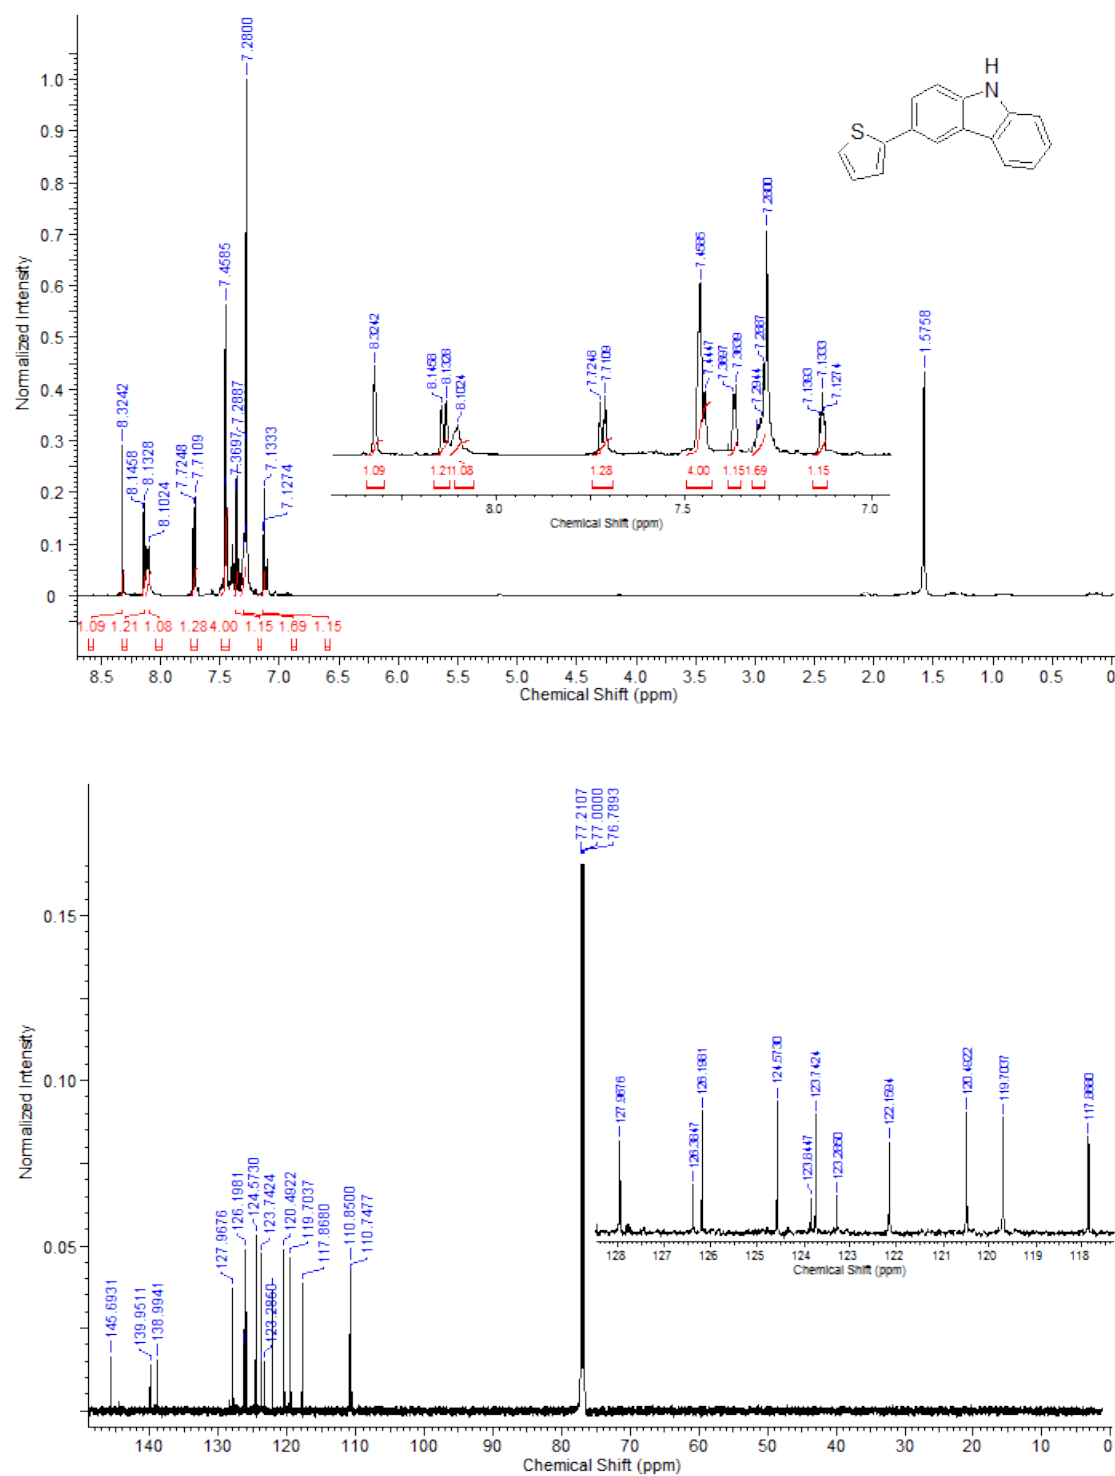

Figure S6. <sup>1</sup>H NMR and <sup>13</sup>C NMR of 3-(Thiophen-2-yl)carbazole (7) in CDCl<sub>3</sub>.

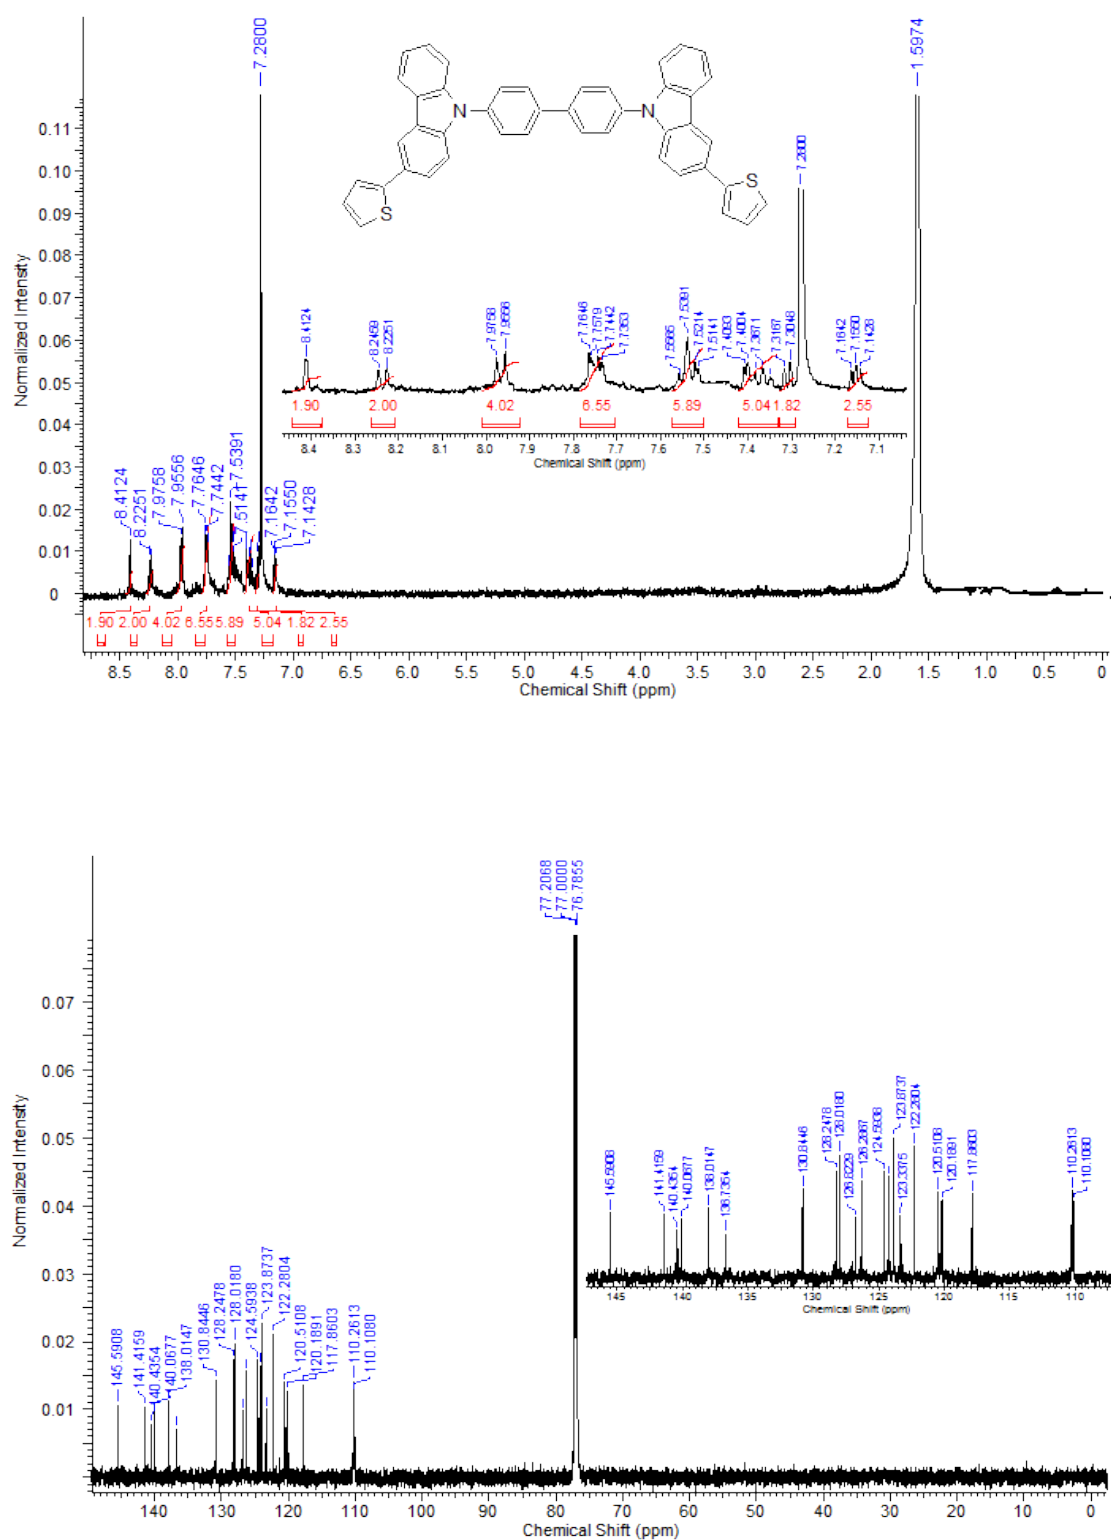

Figure S7. <sup>1</sup>H NMR and <sup>13</sup>C NMR of compound P4 in CDCl<sub>3</sub>.



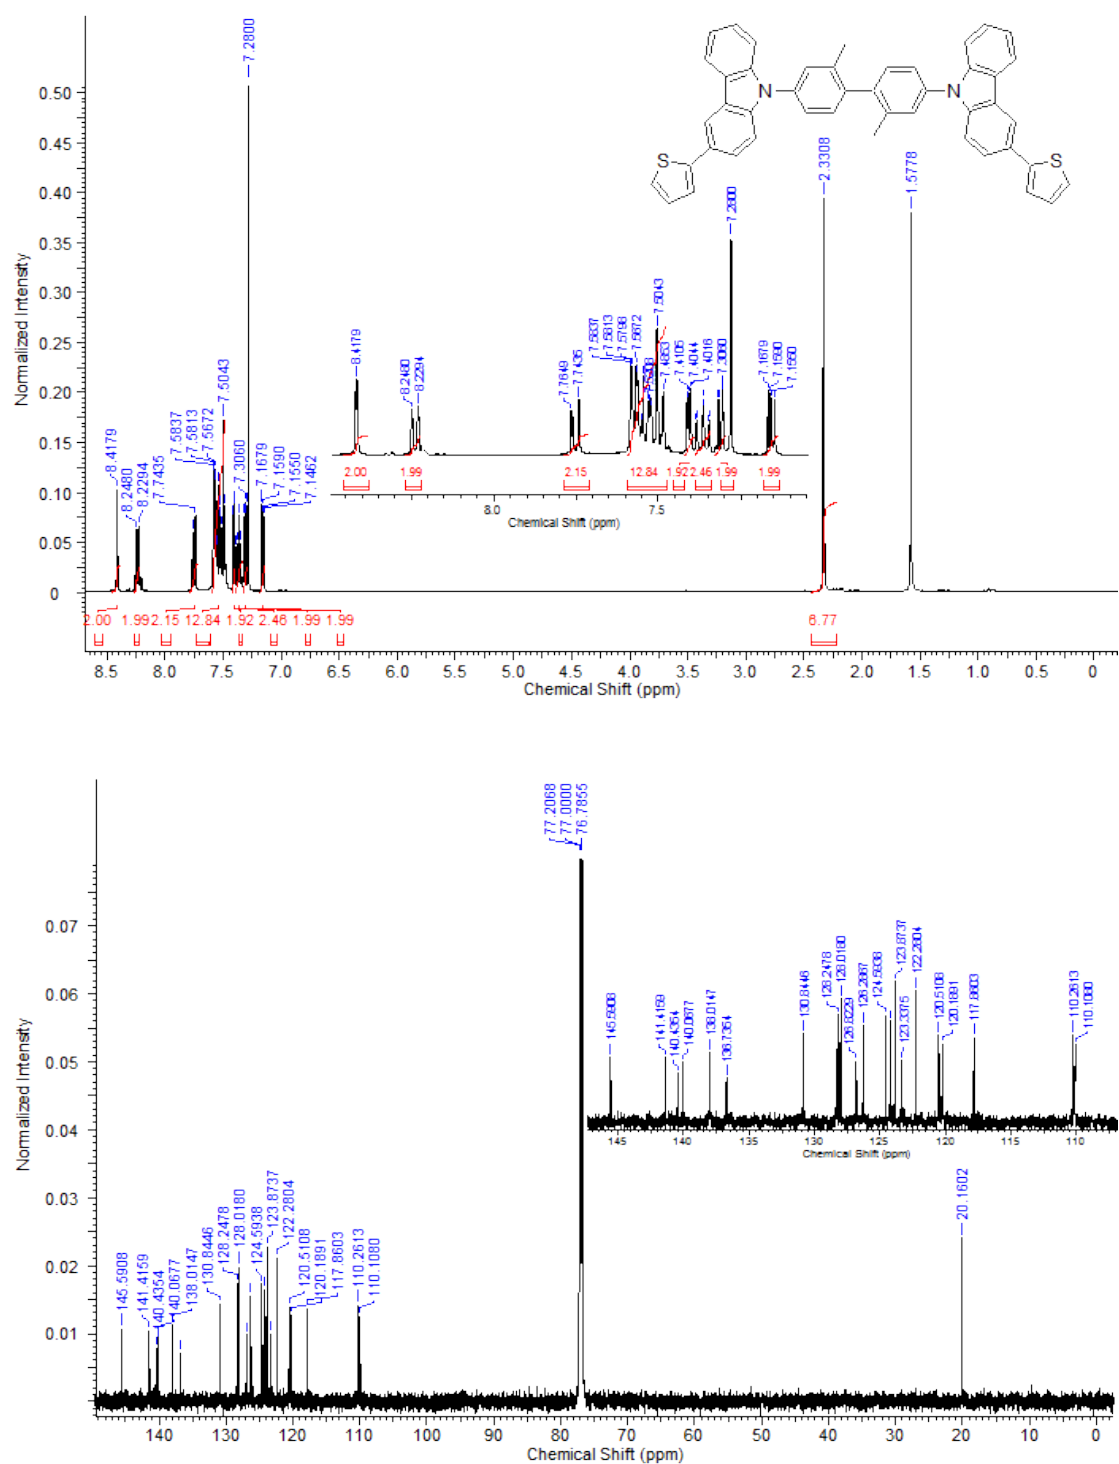

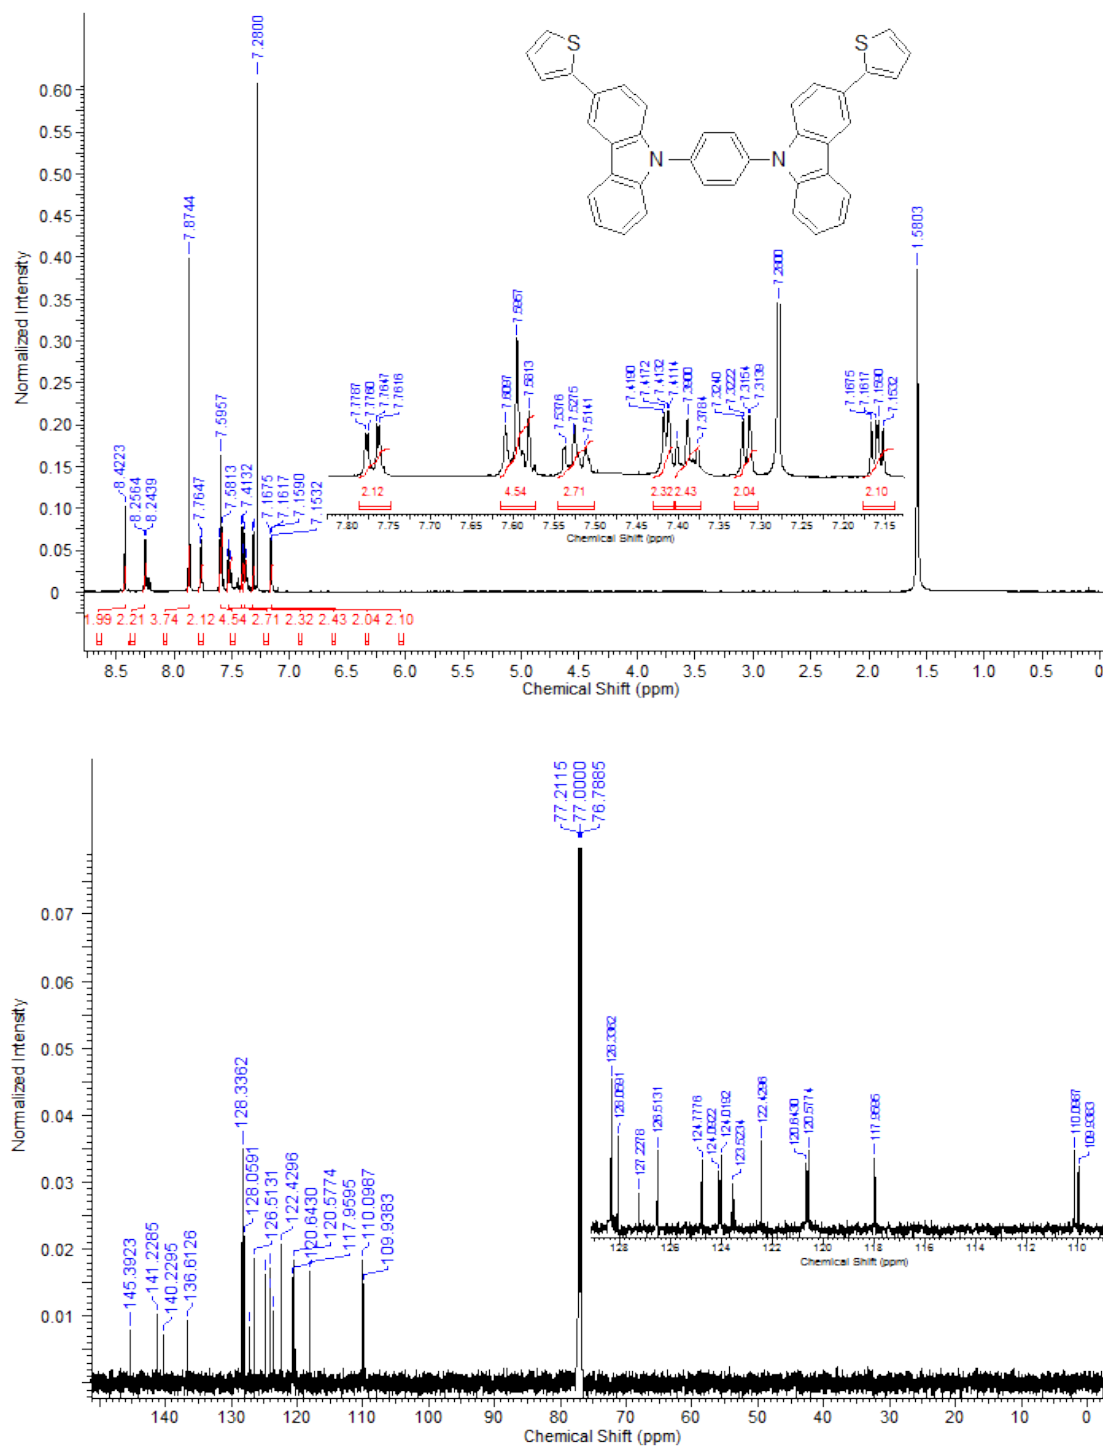

Figure S9. <sup>1</sup>H NMR and <sup>13</sup>C NMR of compound P6 in CDCl<sub>3</sub>.

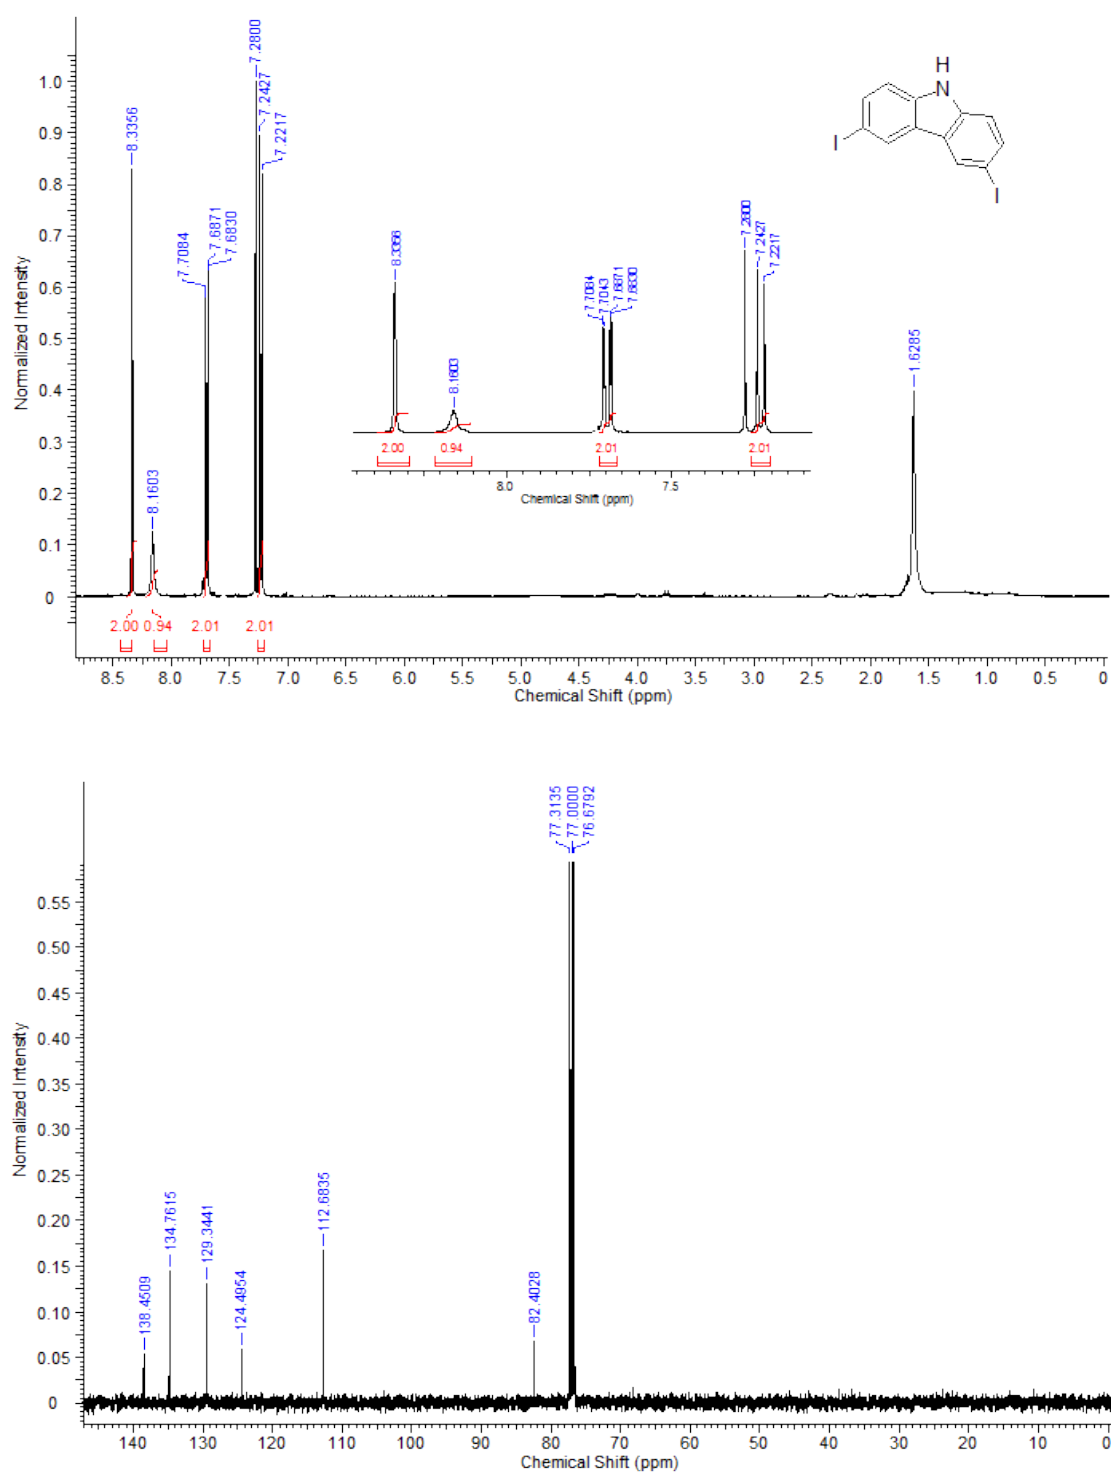

Figure S10. <sup>1</sup>H NMR and <sup>13</sup>C NMR of 3,6-Diiodocarbazole (8) in CDCl<sub>3</sub>.

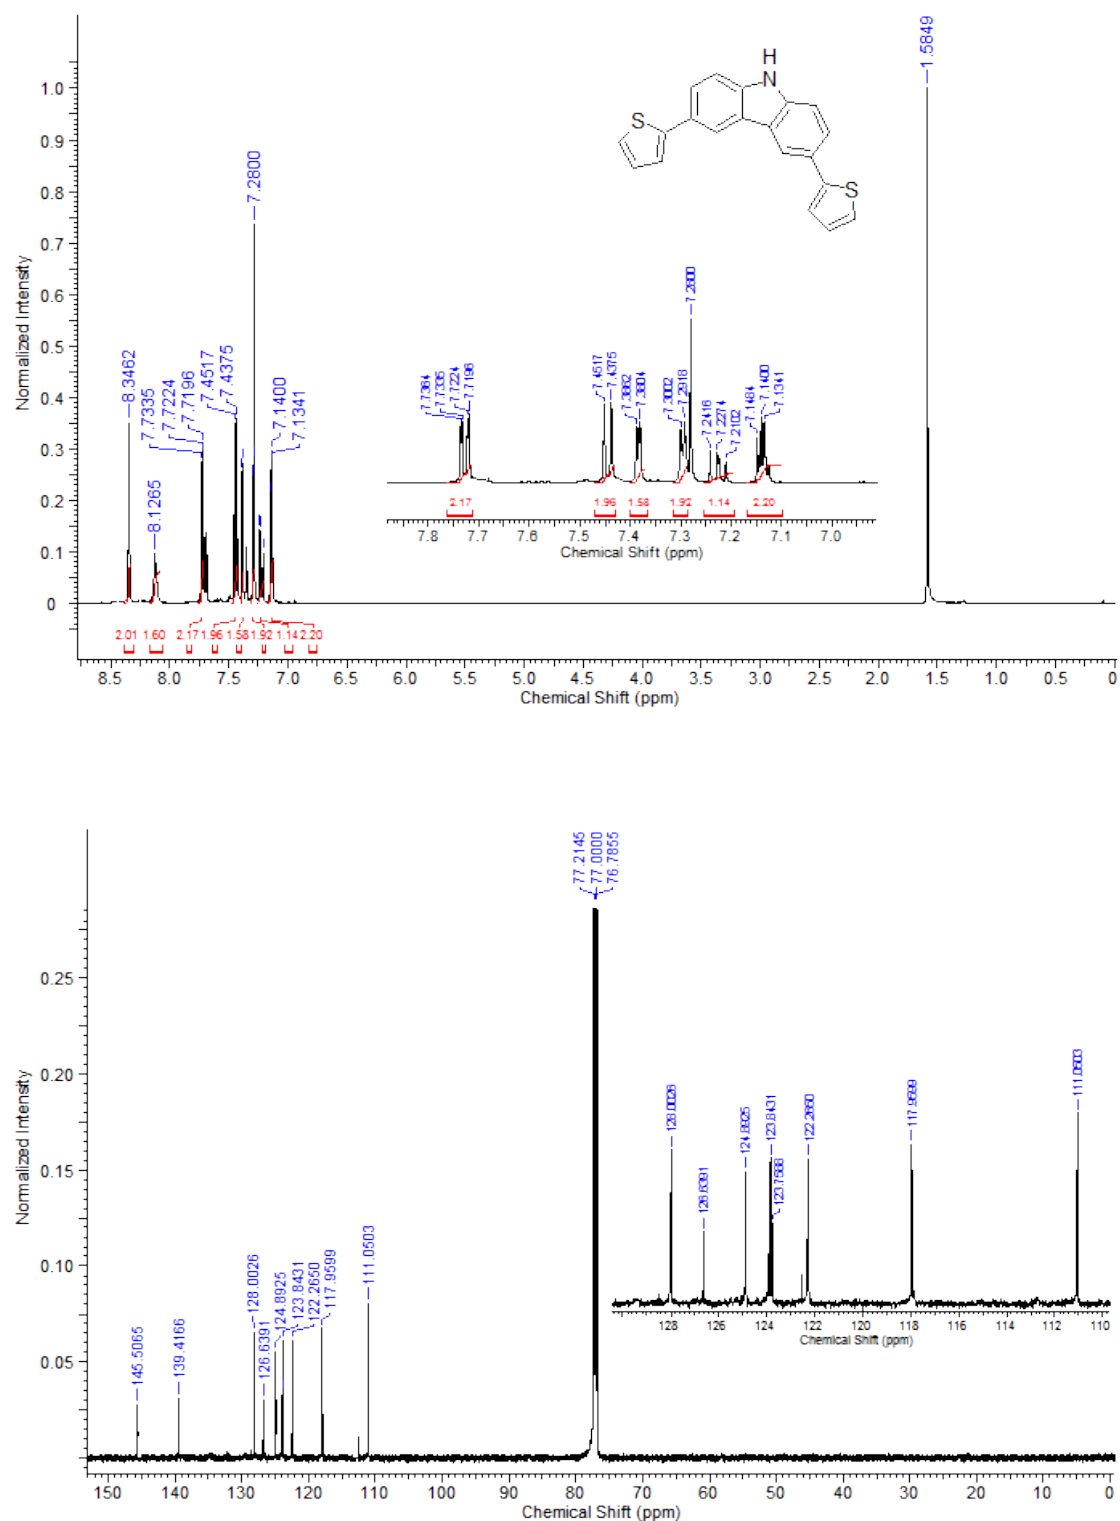

Figure S11. <sup>1</sup>H NMR and <sup>13</sup>C NMR of 3,6-Di(thiophen-2-yl)-9H-carbazole (9) in CDCl<sub>3</sub>.

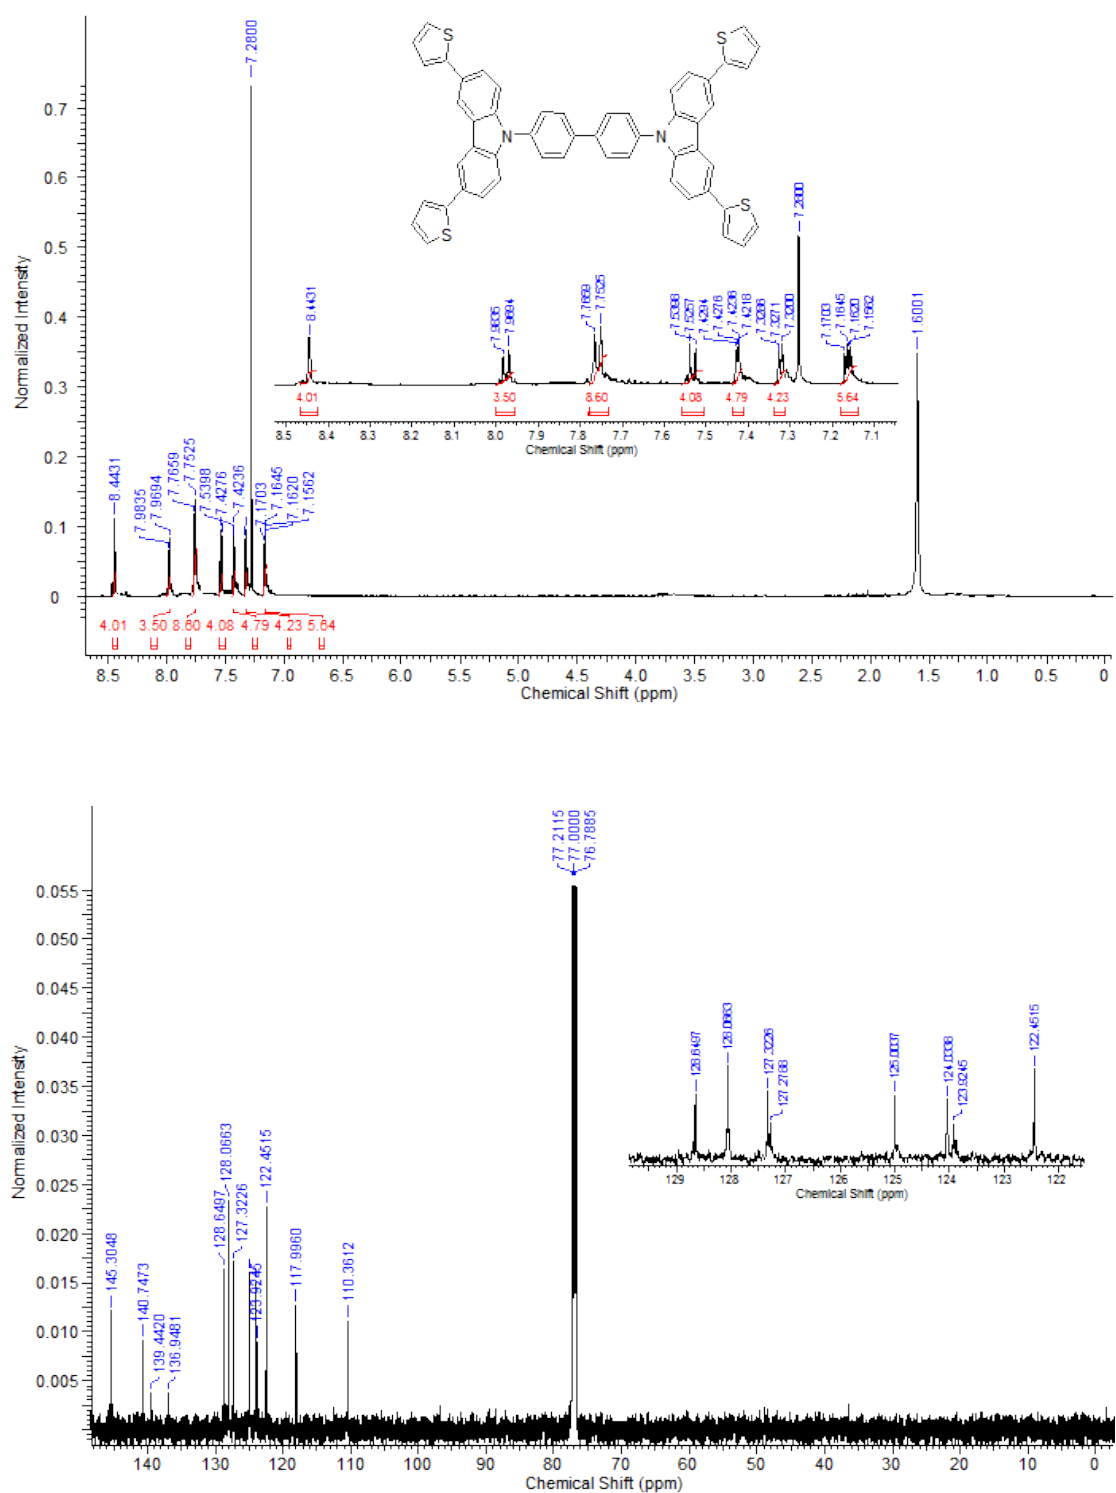

Figure S12. <sup>1</sup>H NMR and <sup>13</sup>C NMR of compound P7 in CDCl<sub>3</sub>.

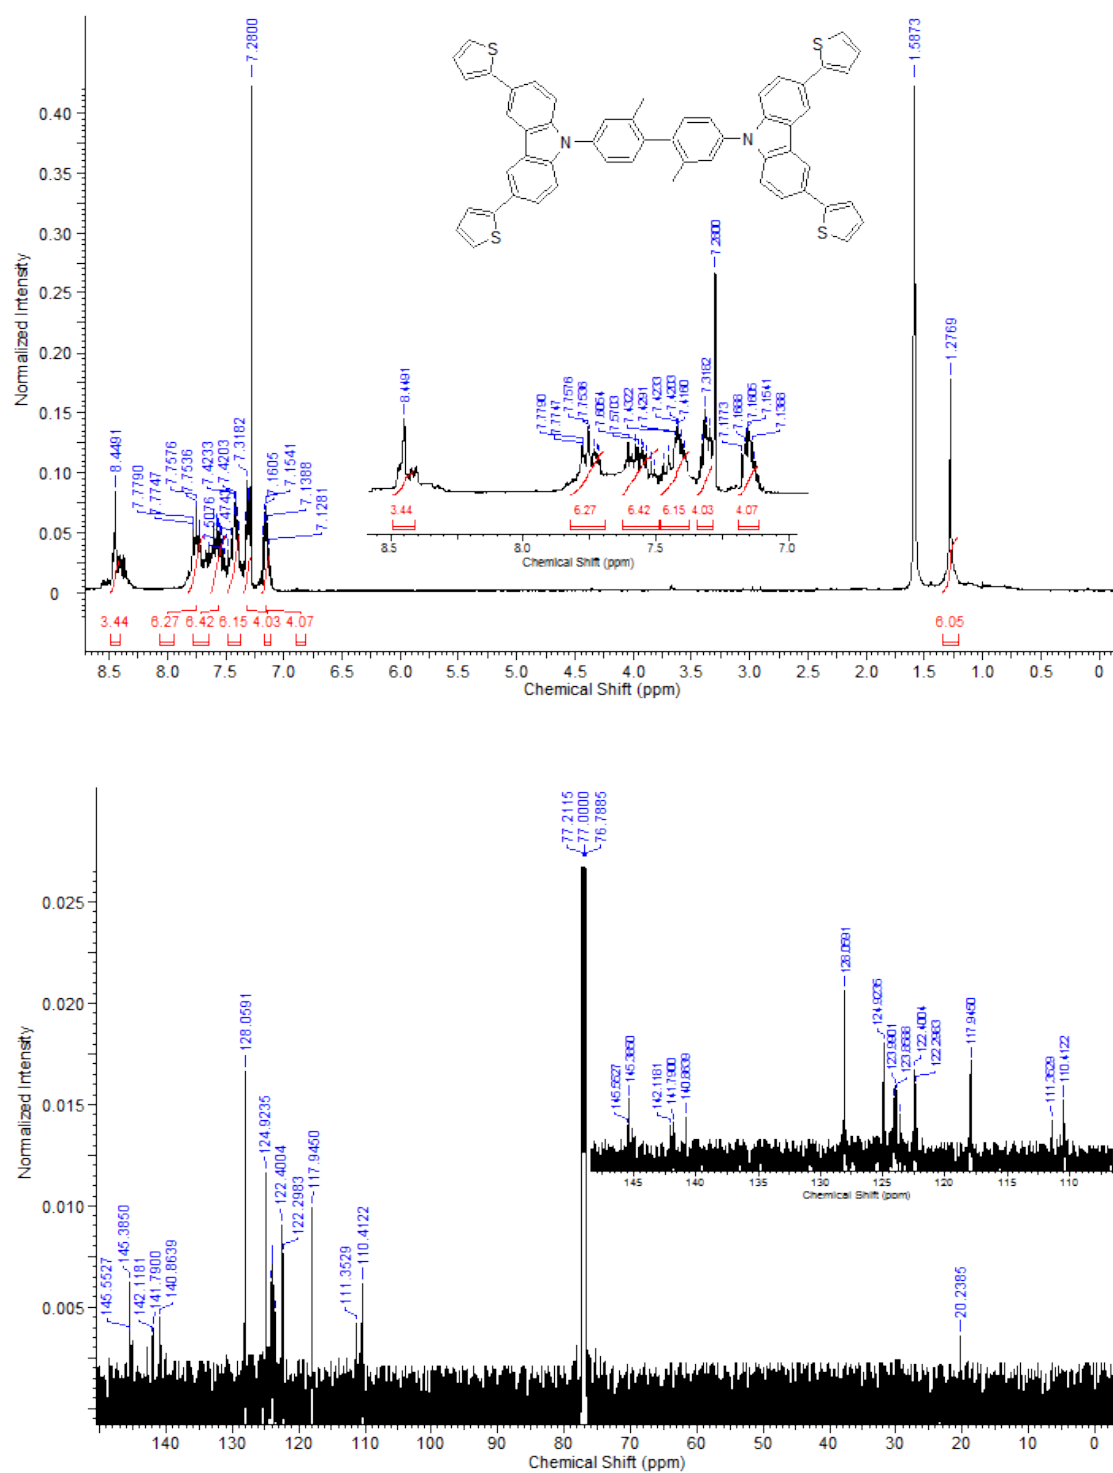

Figure S13. <sup>1</sup>H NMR and <sup>13</sup>C NMR of compound P8 in CDCl<sub>3</sub>.

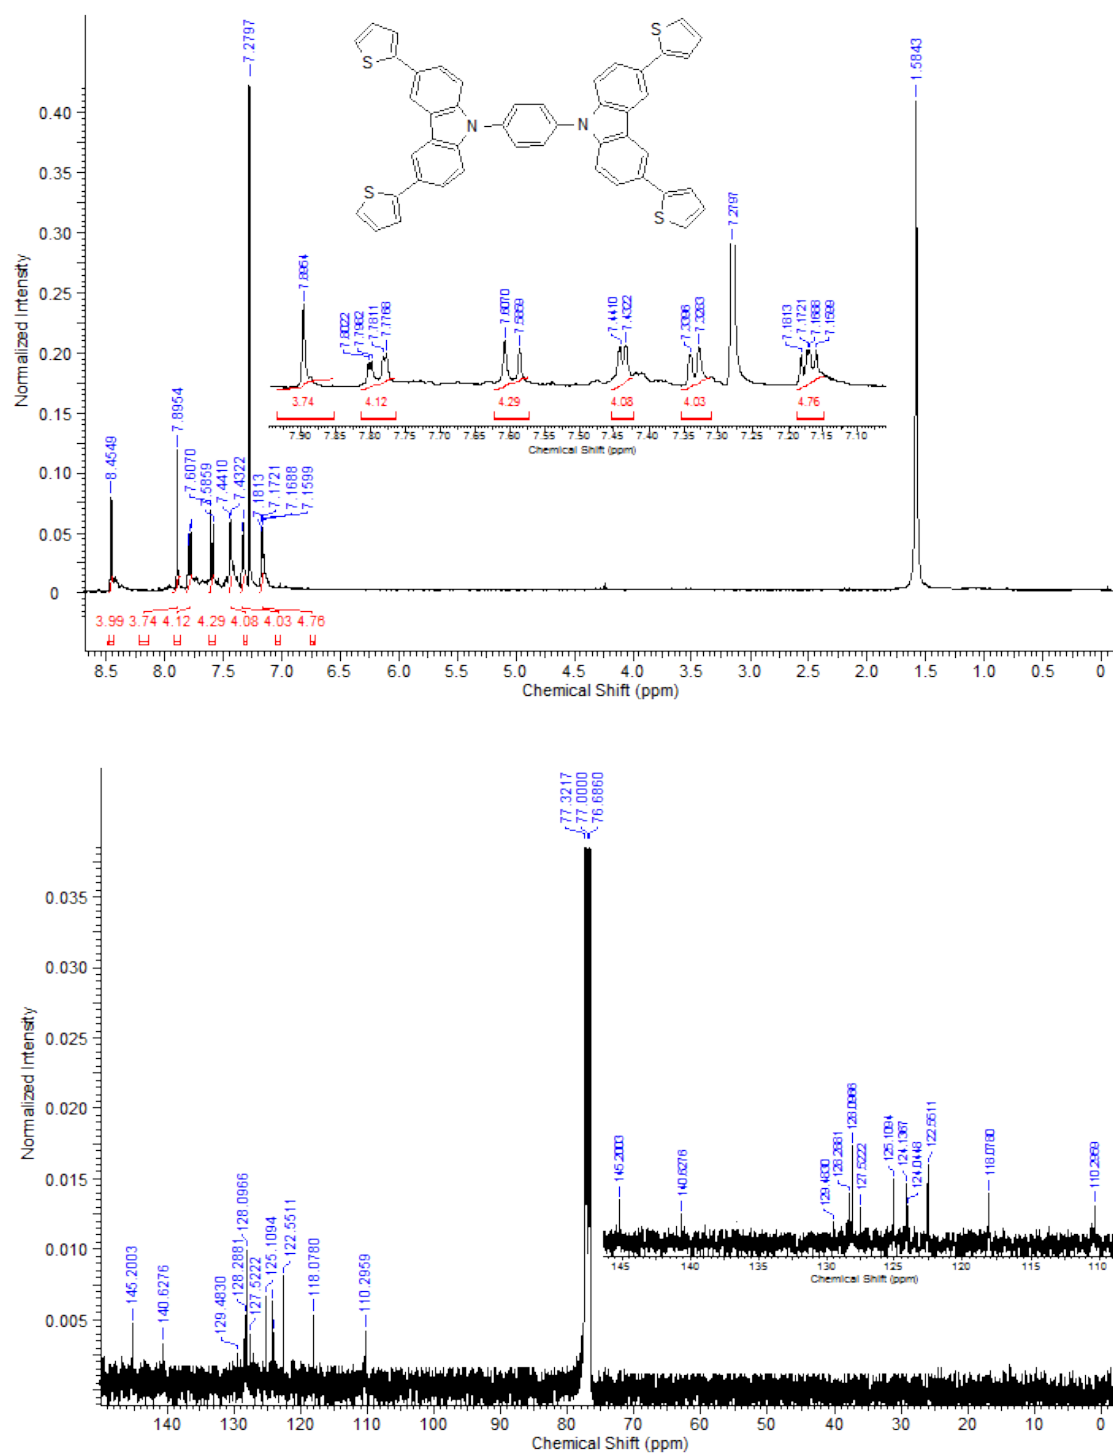

Figure S14. <sup>1</sup>H NMR and <sup>13</sup>C NMR of compound P9 in CDCl<sub>3</sub>.

**Table S1.** Cartesian Coordinates (Å) of the Optimized Structure of **P1** at the B3LYP/6-31G Level.

| Center<br>Number | Atomic<br>Number | Atomic<br>Type | Coordinates (Angstroms) |           |           |
|------------------|------------------|----------------|-------------------------|-----------|-----------|
|                  |                  |                | X                       | Y         | Z         |
| 1                | 6                | 0              | -0.748746               | -0.534047 | -0.179529 |
| 2                | 6                | 0              | -1.147023               | -0.533634 | -1.523127 |
| 3                | 6                | 0              | -2.509763               | -0.534835 | -1.850017 |
| 4                | 6                | 0              | -3.474265               | -0.536522 | -0.833307 |
| 5                | 6                | 0              | -3.075978               | -0.535940 | 0.510316  |
| 6                | 6                | 0              | -1.713216               | -0.534640 | 0.837202  |
| 7                | 6                | 0              | 0.748786                | -0.534085 | 0.179642  |
| 8                | 6                | 0              | 1.713227                | -0.534301 | -0.837114 |
| 9                | 6                | 0              | 3.075994                | -0.535665 | -0.510271 |
| 10               | 6                | 0              | 3.474323                | -0.536661 | 0.833337  |
| 11               | 6                | 0              | 2.509853                | -0.535357 | 1.850080  |
| 12               | 6                | 0              | 1.147098                | -0.534117 | 1.523230  |
| 13               | 1                | 0              | -0.410627               | -0.532473 | -2.299418 |
| 14               | 1                | 0              | -2.813830               | -0.534542 | -2.875900 |
| 15               | 1                | 0              | -3.812359               | -0.536554 | 1.286612  |
| 16               | 1                | 0              | -1.409117               | -0.534195 | 1.863080  |
| 17               | 1                | 0              | 1.409096                | -0.533519 | -1.862984 |
| 18               | 1                | 0              | 3.812350                | -0.536006 | -1.286590 |
| 19               | 1                | 0              | 2.813951                | -0.535390 | 2.875953  |
| 20               | 1                | 0              | 0.410721                | -0.533267 | 2.299540  |
| 21               | 6                | 0              | -5.428642               | 0.853641  | -1.207783 |
| 22               | 6                | 0              | -5.695543               | -1.159096 | -0.078686 |
| 23               | 6                | 0              | -5.237362               | 1.786259  | -2.162077 |
| 24               | 6                | 0              | -6.183180               | 1.117967  | -0.084522 |
| 25               | 6                | 0              | -5.801484               | -2.468245 | 0.224568  |
| 26               | 6                | 0              | -6.357316               | -0.195485 | 0.652310  |
| 27               | 6                | 0              | -5.750962               | 3.080035  | -1.932980 |
| 28               | 1                | 0              | -4.706476               | 1.554561  | -3.061729 |
| 29               | 6                | 0              | -6.662531               | 2.339750  | 0.210017  |
| 30               | 6                | 0              | -6.533380               | -2.821552 | 1.377665  |
| 31               | 1                | 0              | -5.338985               | -3.215398 | -0.385964 |
| 32               | 6                | 0              | -7.034248               | -0.464408 | 1.783135  |
| 33               | 6                | 0              | -6.445977               | 3.364386  | -0.730858 |
| 34               | 1                | 0              | -5.613050               | 3.847695  | -2.665490 |
| 35               | 1                | 0              | -7.193932               | 2.523993  | 1.120273  |
| 36               | 6                | 0              | -7.132365               | -1.813400 | 2.173808  |
| 37               | 1                | 0              | -6.633666               | -3.850626 | 1.653064  |
| 38               | 1                | 0              | -7.486632               | 0.315562  | 2.359235  |
| 39               | 1                | 0              | -6.808098               | 4.353166  | -0.540910 |
| 40               | 1                | 0              | -7.660449               | -2.076946 | 3.066319  |
| 41               | 6                | 0              | 5.428681                | 0.853489  | 1.207873  |
| 42               | 6                | 0              | 5.695558                | -1.159111 | 0.078517  |
| 43               | 6                | 0              | 5.237442                | 1.785998  | 2.162280  |



|    |   |   |           |           |           |
|----|---|---|-----------|-----------|-----------|
| 44 | 6 | 0 | 6.183137  | 1.117960  | 0.084585  |
| 45 | 6 | 0 | 5.801508  | -2.468223 | -0.224891 |
| 46 | 6 | 0 | 6.357259  | -0.195404 | -0.652408 |
| 47 | 6 | 0 | 5.750994  | 3.079814  | 1.933287  |
| 48 | 1 | 0 | 4.706626  | 1.554187  | 3.061941  |
| 49 | 6 | 0 | 6.662439  | 2.339787  | -0.209852 |
| 50 | 6 | 0 | 6.533335  | -2.821387 | -1.378072 |
| 51 | 1 | 0 | 5.339061  | -3.215452 | 0.385588  |
| 52 | 6 | 0 | 7.034121  | -0.464186 | -1.783313 |
| 53 | 6 | 0 | 6.445921  | 3.364314  | 0.731148  |
| 54 | 1 | 0 | 5.613110  | 3.847391  | 2.665887  |
| 55 | 1 | 0 | 7.193774  | 2.524143  | -1.120126 |
| 56 | 6 | 0 | 7.132246  | -1.813134 | -2.174140 |
| 57 | 1 | 0 | 6.633627  | -3.850430 | -1.653589 |
| 58 | 1 | 0 | 7.486448  | 0.315859  | -2.359360 |
| 59 | 1 | 0 | 6.808005  | 4.353122  | 0.541283  |
| 60 | 1 | 0 | 7.660279  | -2.076570 | -3.066716 |
| 61 | 7 | 0 | 4.903804  | -0.539233 | 1.176261  |
| 62 | 7 | 0 | -4.903731 | -0.539067 | -1.176306 |

-----

Rotational constants (GHZ): 0.2265247    0.0357328    0.0343215

The electronic state of the initial guess is 1-A.

Requested convergence on RMS density matrix=1.00D-08 within 128 cycles.

Requested convergence on MAX density matrix=1.00D-06.

Requested convergence on energy=1.00D-06.

No special actions if energy rises.

Integral accuracy reduced to 1.0D-05 until final iterations.

Initial convergence to 1.0D-05 achieved. Increase integral accuracy.

SCF Done: E(RB3LYP) = -1495.69665403 A.U. after 15 cycles

Convrg = 0.3793D-08            -V/T = 2.0028

**Table S2.** Cartesian Coordinates (Å) of the Optimized Structure of **P2** at the B3LYP/6-31G Level.

| Center<br>Number | Atomic<br>Number | Atomic<br>Type | Coordinates (Angstroms) |          |           |
|------------------|------------------|----------------|-------------------------|----------|-----------|
|                  |                  |                | X                       | Y        | Z         |
| 1                | 6                | 0              | -5.760189               | 0.935433 | -0.786051 |
| 2                | 6                | 0              | -7.111119               | 0.676383 | -0.502148 |
| 3                | 6                | 0              | -8.104007               | 1.376576 | -1.180557 |
| 4                | 6                | 0              | -7.737061               | 2.319788 | -2.127112 |
| 5                | 6                | 0              | -6.386433               | 2.565580 | -2.397701 |
| 6                | 6                | 0              | -5.381575               | 1.879703 | -1.733806 |
| 7                | 1                | 0              | -9.141615               | 1.190929 | -0.975613 |
| 8                | 1                | 0              | -8.491672               | 2.867453 | -2.657991 |
| 9                | 1                | 0              | -6.122209               | 3.300408 | -3.134262 |

|    |   |   |           |           |           |
|----|---|---|-----------|-----------|-----------|
| 10 | 1 | 0 | -4.348034 | 2.072702  | -1.944965 |
| 11 | 6 | 0 | -7.132477 | -0.353319 | 0.524166  |
| 12 | 6 | 0 | -8.153548 | -1.013048 | 1.201249  |
| 13 | 6 | 0 | -5.793347 | -0.666128 | 0.810121  |
| 14 | 6 | 0 | -7.826092 | -1.969963 | 2.148579  |
| 15 | 1 | 0 | -9.182585 | -0.785948 | 0.994841  |
| 16 | 6 | 0 | -5.454346 | -1.624434 | 1.758770  |
| 17 | 6 | 0 | -6.486814 | -2.269371 | 2.421391  |
| 18 | 1 | 0 | -8.602829 | -2.486665 | 2.678586  |
| 19 | 1 | 0 | -4.429639 | -1.857671 | 1.972385  |
| 20 | 1 | 0 | -6.253313 | -3.013541 | 3.158975  |
| 21 | 7 | 0 | -4.963217 | 0.118164  | 0.012464  |
| 22 | 6 | 0 | -3.540299 | 0.089167  | 0.012753  |
| 23 | 6 | 0 | -2.823051 | 0.921287  | 0.857740  |
| 24 | 6 | 0 | -2.864532 | -0.774500 | -0.838775 |
| 25 | 6 | 0 | -1.436352 | 0.876230  | 0.841714  |
| 26 | 1 | 0 | -3.344127 | 1.591439  | 1.513653  |
| 27 | 6 | 0 | -1.472966 | -0.829203 | -0.865939 |
| 28 | 1 | 0 | -3.437724 | -1.408503 | -1.488473 |
| 29 | 6 | 0 | -0.749822 | 0.010619  | -0.006523 |
| 30 | 1 | 0 | -0.878273 | 1.521498  | 1.493875  |
| 31 | 6 | 0 | 0.749820  | 0.010616  | 0.006526  |
| 32 | 6 | 0 | 1.436340  | 0.876226  | -0.841724 |
| 33 | 6 | 0 | 1.472974  | -0.829209 | 0.865927  |
| 34 | 6 | 0 | 2.823036  | 0.921294  | -0.857763 |
| 35 | 1 | 0 | 0.878241  | 1.521465  | -1.493895 |
| 36 | 6 | 0 | 2.864541  | -0.774488 | 0.838756  |
| 37 | 6 | 0 | 3.540295  | 0.089185  | -0.012774 |
| 38 | 1 | 0 | 3.344102  | 1.591444  | -1.513685 |
| 39 | 1 | 0 | 3.437742  | -1.408492 | 1.488448  |
| 40 | 7 | 0 | 4.963215  | 0.118196  | -0.012492 |
| 41 | 6 | 0 | 5.760183  | 0.935461  | 0.786032  |
| 42 | 6 | 0 | 5.381565  | 1.879742  | 1.733773  |
| 43 | 6 | 0 | 7.111115  | 0.676416  | 0.502129  |
| 44 | 6 | 0 | 6.386419  | 2.565626  | 2.397667  |
| 45 | 1 | 0 | 4.348022  | 2.072737  | 1.944929  |
| 46 | 6 | 0 | 8.103998  | 1.376639  | 1.180515  |
| 47 | 6 | 0 | 7.737048  | 2.319840  | 2.127078  |
| 48 | 1 | 0 | 6.122190  | 3.300453  | 3.134228  |
| 49 | 1 | 0 | 9.141608  | 1.190988  | 0.975579  |
| 50 | 1 | 0 | 8.491655  | 2.867510  | 2.657956  |
| 51 | 6 | 0 | 5.793349  | -0.666111 | -0.810132 |
| 52 | 6 | 0 | 7.132479  | -0.353336 | -0.524135 |
| 53 | 6 | 0 | 5.454354  | -1.624443 | -1.758755 |
| 54 | 6 | 0 | 8.153554  | -1.013107 | -1.201171 |
| 55 | 6 | 0 | 6.486825  | -2.269435 | -2.421317 |
| 56 | 1 | 0 | 4.429647  | -1.857677 | -1.972377 |
| 57 | 6 | 0 | 7.826102  | -1.970045 | -2.148479 |
| 58 | 1 | 0 | 9.182589  | -0.786011 | -0.994754 |

|    |   |   |           |           |           |
|----|---|---|-----------|-----------|-----------|
| 59 | 1 | 0 | 6.253329  | -3.013631 | -3.158876 |
| 60 | 1 | 0 | 8.602842  | -2.486776 | -2.678454 |
| 61 | 6 | 0 | 0.777928  | -1.776632 | 1.817464  |
| 62 | 1 | 0 | 0.173656  | -1.238866 | 2.539072  |
| 63 | 1 | 0 | 0.117868  | -2.457639 | 1.292789  |
| 64 | 1 | 0 | 1.501713  | -2.368117 | 2.363352  |
| 65 | 6 | 0 | -0.777899 | -1.776613 | -1.817472 |
| 66 | 1 | 0 | -0.173474 | -1.238850 | -2.538952 |
| 67 | 1 | 0 | -0.117987 | -2.457747 | -1.292775 |
| 68 | 1 | 0 | -1.501679 | -2.367970 | -2.363508 |

-----

Rotational constants (GHZ): 0.2433396    0.0297766    0.0297603  
 Requested convergence on RMS density matrix=1.00D-08 within 128 cycles.  
 Requested convergence on MAX density matrix=1.00D-06.  
 Requested convergence on energy=1.00D-06.  
 No special actions if energy rises.  
 SCF Done: E(RHF) = -1563.73833966 A.U. after 7 cycles  
 Convrg = 0.1857D-08            -V/T = 1.9990

**Table S3.** Cartesian Coordinates (Å) of the Optimized Structure of **P3** at the B3LYP/6-31G Level.

| Center<br>Number | Atomic<br>Number | Atomic<br>Type | Coordinates (Angstroms) |           |           |
|------------------|------------------|----------------|-------------------------|-----------|-----------|
|                  |                  |                | X                       | Y         | Z         |
| 1                | 6                | 0              | -4.957853               | -2.983205 | 0.588175  |
| 2                | 6                | 0              | -4.059674               | -3.400737 | -0.424567 |
| 3                | 6                | 0              | -3.264617               | -2.450082 | -1.098513 |
| 4                | 6                | 0              | -3.388561               | -1.154426 | -0.744642 |
| 5                | 6                | 0              | -4.329374               | -0.754243 | 0.178550  |
| 6                | 6                | 0              | -5.086493               | -1.613632 | 0.884052  |
| 7                | 1                | 0              | -5.538526               | -3.705540 | 1.122926  |
| 8                | 1                | 0              | -3.981970               | -4.437814 | -0.676231 |
| 9                | 1                | 0              | -2.578196               | -2.748952 | -1.862968 |
| 10               | 1                | 0              | -5.765307               | -1.268698 | 1.635805  |
| 11               | 6                | 0              | -3.388448               | 1.154002  | -0.745609 |
| 12               | 6                | 0              | -3.264348               | 2.449348  | -1.100578 |
| 13               | 6                | 0              | -4.059377               | 3.400649  | -0.427526 |
| 14               | 6                | 0              | -4.957662               | 2.984060  | 0.585508  |
| 15               | 6                | 0              | -5.086417               | 1.614753  | 0.882579  |
| 16               | 6                | 0              | -4.329325               | 0.754690  | 0.177881  |
| 17               | 1                | 0              | -2.577823               | 2.747504  | -1.865228 |
| 18               | 1                | 0              | -3.981574               | 4.437503  | -0.680094 |
| 19               | 1                | 0              | -5.538326               | 3.706899  | 1.119583  |

|    |   |   |           |           |           |
|----|---|---|-----------|-----------|-----------|
| 20 | 1 | 0 | -5.765303 | 1.270526  | 1.634584  |
| 21 | 6 | 0 | -1.261784 | -0.000310 | -0.609892 |
| 22 | 6 | 0 | -0.102716 | -0.000258 | -1.397619 |
| 23 | 6 | 0 | -1.159089 | -0.000242 | 0.787746  |
| 24 | 6 | 0 | 1.159041  | -0.000207 | -0.787736 |
| 25 | 1 | 0 | -0.181125 | -0.000260 | -2.464747 |
| 26 | 6 | 0 | 0.102674  | -0.000275 | 1.397632  |
| 27 | 1 | 0 | -2.044045 | -0.000184 | 1.389216  |
| 28 | 6 | 0 | 1.261757  | -0.000301 | 0.609905  |
| 29 | 1 | 0 | 2.043981  | -0.000115 | -1.389214 |
| 30 | 1 | 0 | 0.181077  | -0.000282 | 2.464755  |
| 31 | 6 | 0 | 3.388497  | 1.153983  | 0.745633  |
| 32 | 6 | 0 | 3.388577  | -1.154421 | 0.744634  |
| 33 | 6 | 0 | 3.264575  | 2.449277  | 1.100802  |
| 34 | 6 | 0 | 4.329217  | 0.754705  | -0.178046 |
| 35 | 6 | 0 | 3.264743  | -2.450055 | 1.098625  |
| 36 | 6 | 0 | 4.329285  | -0.754251 | -0.178692 |
| 37 | 6 | 0 | 4.059565  | 3.400606  | 0.427750  |
| 38 | 1 | 0 | 2.578221  | 2.747373  | 1.865625  |
| 39 | 6 | 0 | 5.086165  | 1.614827  | -0.882871 |
| 40 | 6 | 0 | 4.059826  | -3.400718 | 0.424726  |
| 41 | 1 | 0 | 2.578393  | -2.748902 | 1.863153  |
| 42 | 6 | 0 | 5.086339  | -1.613682 | -0.884247 |
| 43 | 6 | 0 | 4.957575  | 2.984110  | -0.585565 |
| 44 | 1 | 0 | 3.981942  | 4.437416  | 0.680532  |
| 45 | 1 | 0 | 5.764815  | 1.270672  | -1.635130 |
| 46 | 6 | 0 | 4.957858  | -2.983238 | -0.588167 |
| 47 | 1 | 0 | 3.982254  | -4.437768 | 0.676546  |
| 48 | 1 | 0 | 5.764992  | -1.268798 | -1.636173 |
| 49 | 1 | 0 | 5.538154  | 3.707003  | -1.119664 |
| 50 | 1 | 0 | 5.538541  | -3.705600 | -1.122878 |
| 51 | 7 | 0 | 2.585273  | -0.000456 | 1.249752  |
| 52 | 7 | 0 | -2.585259 | -0.000451 | -1.249748 |

-----

Rotational constants (GHZ): 0.2566061 0.0828358 0.0678497  
The electronic state of the initial guess is 1-A.  
Requested convergence on RMS density matrix=1.00D-08 within 128 cycles.  
Requested convergence on MAX density matrix=1.00D-06.  
Requested convergence on energy=1.00D-06.  
No special actions if energy rises.  
Integral accuracy reduced to 1.0D-05 until final iterations.  
Initial convergence to 1.0D-05 achieved. Increase integral accuracy.  
SCF Done: E(RB3LYP) = -1265.00446024 A.U. after 16 cycles  
Conv g = 0.2418D-08 -V/T = 2.0040

**Table S4.** Cartesian Coordinates (Å) of the Optimized Structure of **P4** at the B3LYP/6-31G Level.

| Center<br>Number | Atomic<br>Number | Atomic<br>Type | Coordinates (Angstroms) |           |           |
|------------------|------------------|----------------|-------------------------|-----------|-----------|
|                  |                  |                | X                       | Y         | Z         |
| 1                | 6                | 0              | -0.674232               | 0.208832  | -0.368298 |
| 2                | 6                | 0              | -0.703266               | 0.227122  | -1.769826 |
| 3                | 6                | 0              | -1.931442               | 0.231513  | -2.445057 |
| 4                | 6                | 0              | -3.129918               | 0.215380  | -1.719220 |
| 5                | 6                | 0              | -3.100707               | 0.197314  | -0.318527 |
| 6                | 6                | 0              | -1.873417               | 0.195199  | 0.357103  |
| 7                | 6                | 0              | 0.675044                | 0.203981  | 0.374052  |
| 8                | 6                | 0              | 1.873548                | 0.202699  | -0.352266 |
| 9                | 6                | 0              | 3.101281                | 0.196078  | 0.322519  |
| 10               | 6                | 0              | 3.131209                | 0.194033  | 1.723369  |
| 11               | 6                | 0              | 1.933357                | 0.196596  | 2.450196  |
| 12               | 6                | 0              | 0.704747                | 0.200462  | 1.775543  |
| 13               | 1                | 0              | 0.212072                | 0.237600  | -2.324145 |
| 14               | 1                | 0              | -1.954086               | 0.246777  | -3.514449 |
| 15               | 1                | 0              | -4.015959               | 0.185419  | 0.235172  |
| 16               | 1                | 0              | -1.852069               | 0.182699  | 1.426675  |
| 17               | 1                | 0              | 1.851286                | 0.206410  | -1.422119 |
| 18               | 1                | 0              | 4.016297                | 0.193065  | -0.231890 |
| 19               | 1                | 0              | 1.956624                | 0.195467  | 3.519762  |
| 20               | 1                | 0              | -0.210424               | 0.201042  | 2.330254  |
| 21               | 6                | 0              | -4.929741               | 1.609088  | -2.564594 |
| 22               | 6                | 0              | -5.465068               | -0.429612 | -1.587771 |
| 23               | 6                | 0              | -4.505161               | 2.563696  | -3.416326 |
| 24               | 6                | 0              | -5.953549               | 1.845875  | -1.671330 |
| 25               | 6                | 0              | -5.635943               | -1.745888 | -1.352768 |
| 26               | 6                | 0              | -6.302215               | 0.515141  | -1.033291 |
| 27               | 6                | 0              | -5.072454               | 3.850357  | -3.301966 |
| 28               | 1                | 0              | -3.756649               | 2.354052  | -4.151323 |
| 29               | 6                | 0              | -6.503819               | 3.059680  | -1.486237 |
| 30               | 6                | 0              | -6.638797               | -2.128283 | -0.437802 |
| 31               | 1                | 0              | -5.025296               | -2.477040 | -1.839426 |
| 32               | 6                | 0              | -7.247508               | 0.217662  | -0.123398 |
| 33               | 6                | 0              | -6.058851               | 4.105549  | -2.316978 |
| 34               | 1                | 0              | -4.755730               | 4.634728  | -3.956917 |
| 35               | 1                | 0              | -7.255528               | 3.222308  | -0.742087 |
| 36               | 6                | 0              | -7.431430               | -1.140602 | 0.198385  |
| 37               | 1                | 0              | -6.799018               | -3.163819 | -0.221627 |
| 38               | 1                | 0              | -7.841350               | 0.982314  | 0.332601  |
| 39               | 1                | 0              | -6.466479               | 5.088741  | -2.207959 |
| 40               | 6                | 0              | 4.928167                | 1.580607  | 2.581379  |
| 41               | 6                | 0              | 5.465802                | -0.446897 | 1.582539  |
| 42               | 6                | 0              | 4.502213                | 2.526037  | 3.442746  |
| 43               | 6                | 0              | 5.950984                | 1.827991  | 1.689930  |

|    |    |   |            |           |           |
|----|----|---|------------|-----------|-----------|
| 44 | 6  | 0 | 5.637672   | -1.760195 | 1.333017  |
| 45 | 6  | 0 | 6.301163   | 0.504686  | 1.037552  |
| 46 | 6  | 0 | 5.067704   | 3.814736  | 3.341488  |
| 47 | 1  | 0 | 3.753856   | 2.307925  | 4.175473  |
| 48 | 6  | 0 | 6.499474   | 3.044359  | 1.517078  |
| 49 | 6  | 0 | 6.640510   | -2.131713 | 0.413651  |
| 50 | 1  | 0 | 5.027591   | -2.497189 | 1.811581  |
| 51 | 6  | 0 | 7.246292   | 0.218182  | 0.123746  |
| 52 | 6  | 0 | 6.053503   | 4.081250  | 2.358707  |
| 53 | 1  | 0 | 4.749955   | 4.592130  | 4.004697  |
| 54 | 1  | 0 | 7.250592   | 3.215462  | 0.774220  |
| 55 | 6  | 0 | 7.431971   | -1.136577 | -0.212216 |
| 56 | 1  | 0 | 6.801481   | -3.164681 | 0.186241  |
| 57 | 1  | 0 | 7.838330   | 0.988803  | -0.324808 |
| 58 | 1  | 0 | 6.460249   | 5.065937  | 2.259568  |
| 59 | 7  | 0 | -4.419034  | 0.217264  | -2.425979 |
| 60 | 7  | 0 | 4.420248   | 0.189343  | 2.428839  |
| 61 | 6  | 0 | -8.493748  | -1.551800 | 1.234208  |
| 62 | 6  | 0 | -9.306117  | -0.684817 | 1.894694  |
| 63 | 16 | 0 | -8.831867  | -3.219415 | 1.726051  |
| 64 | 6  | 0 | -10.394896 | -1.418679 | 2.722230  |
| 65 | 1  | 0 | -9.213203  | 0.379724  | 1.840708  |
| 66 | 6  | 0 | -10.300523 | -2.770108 | 2.608377  |
| 67 | 1  | 0 | -11.140283 | -0.918935 | 3.304914  |
| 68 | 1  | 0 | -11.016273 | -3.465469 | 2.994416  |
| 69 | 6  | 0 | 8.494805   | -1.536435 | -1.251940 |
| 70 | 6  | 0 | 9.305876   | -0.662460 | -1.905404 |
| 71 | 16 | 0 | 8.835327   | -3.199263 | -1.758290 |
| 72 | 6  | 0 | 10.395572  | -1.387778 | -2.739525 |
| 73 | 1  | 0 | 9.211472   | 0.401479  | -1.842530 |
| 74 | 6  | 0 | 10.303293  | -2.740420 | -2.636830 |
| 75 | 1  | 0 | 11.140093  | -0.882131 | -3.318209 |
| 76 | 1  | 0 | 11.020270  | -3.431276 | -3.028606 |

-----  
Rotational constants (GHZ): 0.1001811    0.0172505    0.0170990

The electronic state of the initial guess is 1-A.

Requested convergence on RMS density matrix=1.00D-08 within 128 cycles.

Requested convergence on MAX density matrix=1.00D-06.

Requested convergence on energy=1.00D-06.

No special actions if energy rises.

Integral accuracy reduced to 1.0D-05 until final iterations.

Initial convergence to 1.0D-05 achieved. Increase integral accuracy.

SCF Done: E(RB3LYP) = -2599.25394643 A.U. after 16 cycles

Convrg = 0.4623D-08            -V/T = 2.0025

**Table S5.** Cartesian Coordinates (Å) of the Optimized Structure of **P5** at the B3LYP/6-31G Level.

| Center<br>Number | Atomic<br>Number | Atomic<br>Type | Coordinates (Angstroms) |           |           |
|------------------|------------------|----------------|-------------------------|-----------|-----------|
|                  |                  |                | X                       | Y         | Z         |
| 1                | 6                | 0              | -0.678321               | 0.168565  | -0.368335 |
| 2                | 6                | 0              | -0.754971               | 0.179132  | -1.782821 |
| 3                | 6                | 0              | -1.998617               | 0.184107  | -2.421386 |
| 4                | 6                | 0              | -3.182983               | 0.179300  | -1.675959 |
| 5                | 6                | 0              | -3.119537               | 0.169575  | -0.276900 |
| 6                | 6                | 0              | -1.880456               | 0.164165  | 0.366821  |
| 7                | 6                | 0              | 0.678239                | 0.167911  | 0.368650  |
| 8                | 6                | 0              | 1.880400                | 0.164905  | -0.366548 |
| 9                | 6                | 0              | 3.119492                | 0.169157  | 0.277156  |
| 10               | 6                | 0              | 3.182944                | 0.176276  | 1.676228  |
| 11               | 6                | 0              | 1.998579                | 0.179687  | 2.421691  |
| 12               | 6                | 0              | 0.754876                | 0.175861  | 1.783176  |
| 13               | 1                | 0              | -2.046559               | 0.191910  | -3.494405 |
| 14               | 1                | 0              | -4.023358               | 0.166564  | 0.302044  |
| 15               | 1                | 0              | -1.825994               | 0.156963  | 1.450498  |
| 16               | 1                | 0              | 1.825944                | 0.159719  | -1.450270 |
| 17               | 1                | 0              | 4.023322                | 0.167233  | -0.301806 |
| 18               | 1                | 0              | 2.046581                | 0.185493  | 3.494709  |
| 19               | 6                | 0              | -4.969870               | 1.570654  | -2.545556 |
| 20               | 6                | 0              | -5.524139               | -0.438644 | -1.548417 |
| 21               | 6                | 0              | -4.520089               | 2.514643  | -3.412900 |
| 22               | 6                | 0              | -6.016787               | 1.830088  | -1.673786 |
| 23               | 6                | 0              | -5.701222               | -1.761275 | -1.288836 |
| 24               | 6                | 0              | -6.379110               | 0.523710  | -1.024584 |
| 25               | 6                | 0              | -5.084276               | 3.805054  | -3.334330 |
| 26               | 1                | 0              | -3.753815               | 2.289870  | -4.131525 |
| 27               | 6                | 0              | -6.562321               | 3.068242  | -1.537193 |
| 28               | 6                | 0              | -6.722642               | -2.125794 | -0.390619 |
| 29               | 1                | 0              | -5.077955               | -2.506352 | -1.747923 |
| 30               | 6                | 0              | -7.350146               | 0.224376  | -0.124274 |
| 31               | 6                | 0              | -6.086566               | 4.087205  | -2.382648 |
| 32               | 1                | 0              | -4.747543               | 4.577204  | -4.000629 |
| 33               | 1                | 0              | -7.334405               | 3.261846  | -0.815709 |
| 34               | 6                | 0              | -7.535010               | -1.132168 | 0.212801  |
| 35               | 1                | 0              | -6.885258               | -3.161798 | -0.160073 |
| 36               | 1                | 0              | -7.961572               | 0.992671  | 0.310299  |
| 37               | 1                | 0              | -6.489645               | 5.080129  | -2.307853 |
| 38               | 6                | 0              | 4.969808                | 1.566078  | 2.548302  |
| 39               | 6                | 0              | 5.524093                | -0.441423 | 1.547535  |
| 40               | 6                | 0              | 4.520015                | 2.508508  | 3.417327  |
| 41               | 6                | 0              | 6.016713                | 1.827083  | 1.676982  |
| 42               | 6                | 0              | 5.701180                | -1.763587 | 1.285564  |
| 43               | 6                | 0              | 6.379054                | 0.521878  | 1.025455  |

|    |    |   |            |           |           |
|----|----|---|------------|-----------|-----------|
| 44 | 6  | 0 | 5.084196   | 3.799062  | 3.341064  |
| 45 | 1  | 0 | 3.753756   | 2.282444  | 4.135556  |
| 46 | 6  | 0 | 6.562238   | 3.065480  | 1.542609  |
| 47 | 6  | 0 | 6.722618   | -2.126481 | 0.386717  |
| 48 | 1  | 0 | 5.077877   | -2.509484 | 1.743297  |
| 49 | 6  | 0 | 7.350118   | 0.224169  | 0.124633  |
| 50 | 6  | 0 | 6.086473   | 4.082924  | 2.389885  |
| 51 | 1  | 0 | 4.747467   | 4.570017  | 4.008753  |
| 52 | 1  | 0 | 7.334308   | 3.260387  | 0.821457  |
| 53 | 6  | 0 | 7.535035   | -1.131779 | -0.214848 |
| 54 | 1  | 0 | 6.885214   | -3.162064 | 0.154293  |
| 55 | 1  | 0 | 7.961546   | 0.993246  | -0.308558 |
| 56 | 1  | 0 | 6.489548   | 5.075992  | 2.316858  |
| 57 | 6  | 0 | -8.605138  | -1.529126 | 1.213912  |
| 58 | 6  | 0 | -9.449890  | -0.668174 | 1.851968  |
| 59 | 16 | 0 | -8.924229  | -3.199417 | 1.696323  |
| 60 | 6  | 0 | -10.517851 | -1.394820 | 2.647967  |
| 61 | 1  | 0 | -9.378517  | 0.400862  | 1.792469  |
| 62 | 6  | 0 | -10.398474 | -2.746488 | 2.553788  |
| 63 | 1  | 0 | -11.283717 | -0.896549 | 3.211815  |
| 64 | 1  | 0 | -11.106456 | -3.455649 | 2.937290  |
| 65 | 6  | 0 | 8.605245   | -1.526917 | -1.216582 |
| 66 | 6  | 0 | 9.450035   | -0.664799 | -1.853033 |
| 67 | 16 | 0 | 8.924406   | -3.196314 | -1.701974 |
| 68 | 6  | 0 | 10.518059  | -1.390000 | -2.650268 |
| 69 | 1  | 0 | 9.378655   | 0.404130  | -1.791619 |
| 70 | 6  | 0 | 10.398691  | -2.741833 | -2.558524 |
| 71 | 1  | 0 | 11.283954  | -0.890711 | -3.213169 |
| 72 | 1  | 0 | 11.106694  | -3.450303 | -2.943253 |
| 73 | 6  | 0 | -0.509322  | 0.180965  | 2.644830  |
| 74 | 1  | 0 | -1.286272  | 0.687516  | 2.081843  |
| 75 | 1  | 0 | -0.814891  | -0.832156 | 2.846432  |
| 76 | 1  | 0 | -0.324620  | 0.689173  | 3.576771  |
| 77 | 6  | 0 | 0.509237   | 0.185875  | -2.644315 |
| 78 | 1  | 0 | 1.286092   | 0.691415  | -2.080273 |
| 79 | 1  | 0 | 0.814844   | -0.826860 | -2.847743 |
| 80 | 1  | 0 | 0.324613   | 0.695798  | -3.575326 |
| 81 | 7  | 0 | 4.470409   | 0.180369  | 2.375119  |
| 82 | 7  | 0 | -4.470449  | 0.184642  | -2.374868 |

-----  
Rotational constants (GHZ): 0.097534 0.0168097 0.0167615

The electronic state of the initial guess is 1-A.

Requested convergence on RMS density matrix=1.00D-08 within 128 cycles.

Requested convergence on MAX density matrix=1.00D-06.

Requested convergence on energy=1.00D-06.

No special actions if energy rises.

Integral accuracy reduced to 1.0D-05 until final iterations.

Initial convergence to 1.0D-05 achieved. Increase integral accuracy.

SCF Done: E(RB3LYP) = -2678.37684898 A.U. after 38 cycles

S24



Convrg = 0.6124D-09      -V/T = 2.0035

**Table S6.** Cartesian Coordinates (Å) of the Optimized Structure of **P6** at the B3LYP/6-31G Level.

| Center<br>Number | Atomic<br>Number | Atomic<br>Type | Coordinates (Angstroms) |           |           |
|------------------|------------------|----------------|-------------------------|-----------|-----------|
|                  |                  |                | X                       | Y         | Z         |
| 1                | 6                | 0              | 2.956566                | 5.054733  | 0.658180  |
| 2                | 6                | 0              | 1.806972                | 5.040143  | -0.157397 |
| 3                | 6                | 0              | 1.468627                | 3.884916  | -0.890501 |
| 4                | 6                | 0              | 2.286013                | 2.793329  | -0.776508 |
| 5                | 6                | 0              | 3.444458                | 2.841066  | -0.051202 |
| 6                | 6                | 0              | 3.795793                | 3.928184  | 0.707191  |
| 7                | 1                | 0              | 3.193311                | 5.930844  | 1.238849  |
| 8                | 1                | 0              | 1.182757                | 5.915795  | -0.219929 |
| 9                | 1                | 0              | 0.590640                | 3.862342  | -1.514869 |
| 10               | 1                | 0              | 4.685900                | 3.925017  | 1.314673  |
| 11               | 6                | 0              | 3.392698                | 0.830916  | -1.168892 |
| 12               | 6                | 0              | 3.846979                | -0.333058 | -1.734109 |
| 13               | 6                | 0              | 5.105395                | -0.812156 | -1.328153 |
| 14               | 6                | 0              | 5.869910                | -0.104204 | -0.371197 |
| 15               | 6                | 0              | 5.383670                | 1.116932  | 0.147252  |
| 16               | 6                | 0              | 4.169128                | 1.558401  | -0.306918 |
| 17               | 1                | 0              | 3.259087                | -0.868778 | -2.460839 |
| 18               | 1                | 0              | 5.488161                | -1.726377 | -1.749255 |
| 19               | 1                | 0              | 5.949855                | 1.682616  | 0.867117  |
| 20               | 6                | 0              | 1.024034                | 0.720904  | -0.672193 |
| 21               | 6                | 0              | -0.076085               | 0.241622  | -1.391468 |
| 22               | 6                | 0              | 1.106973                | 0.489239  | 0.707735  |
| 23               | 6                | 0              | -1.090332               | -0.465487 | -0.737686 |
| 24               | 1                | 0              | -0.138817               | 0.419553  | -2.452060 |
| 25               | 6                | 0              | 0.093056                | -0.217900 | 1.361900  |
| 26               | 1                | 0              | 1.950603                | 0.855251  | 1.267211  |
| 27               | 6                | 0              | -1.006859               | -0.696995 | 0.642074  |
| 28               | 1                | 0              | -1.934073               | -0.832113 | -1.296718 |
| 29               | 1                | 0              | 0.155824                | -0.396131 | 2.422467  |
| 30               | 6                | 0              | -2.269488               | -2.772115 | 0.747567  |
| 31               | 6                | 0              | -3.373424               | -0.807050 | 1.134120  |
| 32               | 6                | 0              | -1.454126               | -3.863213 | 0.866671  |
| 33               | 6                | 0              | -3.427078               | -2.818608 | 0.020105  |
| 34               | 6                | 0              | -3.824672               | 0.361561  | 1.699482  |
| 35               | 6                | 0              | -4.149193               | -1.537899 | 0.270715  |
| 36               | 6                | 0              | -1.793826               | -5.022116 | 0.134526  |
| 37               | 1                | 0              | -0.577438               | -3.839983 | 1.492838  |
| 38               | 6                | 0              | -3.779494               | -3.908392 | -0.738127 |

|    |    |   |            |           |           |
|----|----|---|------------|-----------|-----------|
| 39 | 6  | 0 | -5.081924  | 0.842750  | 1.289834  |
| 40 | 1  | 0 | -3.236871  | 0.896096  | 2.426952  |
| 41 | 6  | 0 | -5.363921  | -1.095683 | -0.188503 |
| 42 | 6  | 0 | -2.941852  | -5.036155 | -0.683424 |
| 43 | 1  | 0 | -1.171428  | -5.898775 | 0.200335  |
| 44 | 1  | 0 | -4.667902  | -3.904915 | -1.347991 |
| 45 | 6  | 0 | -5.846221  | 0.132631  | 0.330724  |
| 46 | 1  | 0 | -5.464615  | 1.757979  | 1.708923  |
| 47 | 1  | 0 | -5.930654  | -1.661491 | -0.907501 |
| 48 | 1  | 0 | -3.178699  | -5.913342 | -1.262480 |
| 49 | 6  | 0 | 7.197804   | -0.648256 | 0.087133  |
| 50 | 6  | 0 | 8.022544   | -0.060371 | 1.007888  |
| 51 | 16 | 0 | 7.879273   | -2.167379 | -0.503059 |
| 52 | 6  | 0 | 9.183890   | -0.935223 | 1.371337  |
| 53 | 1  | 0 | 7.858532   | 0.913543  | 1.433911  |
| 54 | 6  | 0 | 9.164416   | -2.120804 | 0.700564  |
| 55 | 1  | 0 | 9.939813   | -0.656514 | 2.085382  |
| 56 | 1  | 0 | 9.831292   | -2.945532 | 0.879595  |
| 57 | 6  | 0 | -7.165080  | 0.677118  | -0.127696 |
| 58 | 6  | 0 | -7.996343  | 0.075422  | -1.040678 |
| 59 | 16 | 0 | -7.855744  | 2.191320  | 0.469522  |
| 60 | 6  | 0 | -9.312368  | 0.776879  | -1.154430 |
| 61 | 1  | 0 | -7.742238  | -0.804445 | -1.604612 |
| 62 | 6  | 0 | -9.391134  | 1.861570  | -0.330314 |
| 63 | 1  | 0 | -10.104867 | 0.454515  | -1.807803 |
| 64 | 1  | 0 | -10.277050 | 2.448368  | -0.163183 |
| 65 | 7  | 0 | -2.058305  | -1.436646 | 1.354266  |
| 66 | 7  | 0 | 2.073933   | 1.460594  | -1.386843 |

-----  
Rotational constants (GHZ): 0.1381161    0.0305733    0.0262602

The electronic state of the initial guess is 1-A.

Requested convergence on RMS density matrix=1.00D-08 within 128 cycles.

Requested convergence on MAX density matrix=1.00D-06.

Requested convergence on energy=1.00D-06.

No special actions if energy rises.

Integral accuracy reduced to 1.0D-05 until final iterations.

Initial convergence to 1.0D-05 achieved. Increase integral accuracy.

SCF Done: E(RB3LYP) = -2368.45122171 A.U. after 129 cycles

Convgt = 0.1583D-06            -V/T = 2.0076

**Table S7.** Cartesian Coordinates (Å) of the Optimized Structure of **P7** at the B3LYP/6-31G Level.

| Center<br>Number | Atomic<br>Number | Atomic<br>Type | Coordinates (Angstroms) |           |           |
|------------------|------------------|----------------|-------------------------|-----------|-----------|
|                  |                  |                | X                       | Y         | Z         |
| 1                | 6                | 0              | -0.697700               | 0.004877  | 0.049145  |
| 2                | 6                | 0              | -1.475186               | 0.008933  | -1.162052 |
| 3                | 6                | 0              | -2.860027               | 0.008259  | -1.152082 |
| 4                | 6                | 0              | -3.576047               | 0.003008  | 0.064175  |
| 5                | 6                | 0              | -2.847426               | -0.001068 | 1.272822  |
| 6                | 6                | 0              | -1.462456               | 0.000166  | 1.268408  |
| 7                | 6                | 0              | 0.743875                | 0.005177  | 0.041421  |
| 8                | 6                | 0              | 1.512968                | -0.008288 | -1.181159 |
| 9                | 6                | 0              | 2.894029                | -0.008885 | -1.191907 |
| 10               | 6                | 0              | 3.616265                | 0.004645  | 0.025451  |
| 11               | 6                | 0              | 2.907675                | 0.018441  | 1.250789  |
| 12               | 6                | 0              | 1.526502                | 0.018578  | 1.255407  |
| 13               | 1                | 0              | -0.976220               | 0.015686  | -2.123973 |
| 14               | 1                | 0              | -3.410283               | 0.012543  | -2.088709 |
| 15               | 1                | 0              | -3.387962               | -0.006134 | 2.215118  |
| 16               | 1                | 0              | -0.953326               | -0.005836 | 2.224997  |
| 17               | 1                | 0              | 1.000834                | -0.021355 | -2.135272 |
| 18               | 1                | 0              | 3.428890                | -0.020521 | -2.137909 |
| 19               | 1                | 0              | 3.453020                | 0.029596  | 2.190800  |
| 20               | 1                | 0              | 1.024978                | 0.031925  | 2.215190  |
| 21               | 6                | 0              | -5.835723               | 1.132713  | 0.088055  |
| 22               | 6                | 0              | -5.833013               | -1.131958 | 0.051935  |
| 23               | 6                | 0              | -5.482158               | 2.485970  | 0.102199  |
| 24               | 6                | 0              | -7.201936               | 0.725414  | 0.079981  |
| 25               | 6                | 0              | -5.476151               | -2.484133 | 0.023908  |
| 26               | 6                | 0              | -7.200195               | -0.727900 | 0.056582  |
| 27               | 6                | 0              | -6.505778               | 3.429281  | 0.115304  |
| 28               | 1                | 0              | -4.440854               | 2.785788  | 0.109594  |
| 29               | 6                | 0              | -8.212464               | 1.689523  | 0.082739  |
| 30               | 6                | 0              | -6.497480               | -3.429860 | 0.007078  |
| 31               | 1                | 0              | -4.434124               | -2.781515 | 0.022346  |
| 32               | 6                | 0              | -8.208404               | -1.694057 | 0.028581  |
| 33               | 6                | 0              | -7.877185               | 3.057182  | 0.109632  |
| 34               | 1                | 0              | -6.248975               | 4.483023  | 0.149538  |
| 35               | 1                | 0              | -9.255122               | 1.391412  | 0.040967  |
| 36               | 6                | 0              | -7.869775               | -3.061047 | 0.012447  |
| 37               | 1                | 0              | -6.238169               | -4.483548 | 0.008518  |
| 38               | 1                | 0              | -9.251808               | -1.397375 | -0.003900 |
| 39               | 6                | 0              | 5.875066                | 1.127709  | -0.001618 |
| 40               | 6                | 0              | 5.872773                | -1.124111 | 0.024149  |
| 41               | 6                | 0              | 5.500106                | 2.479369  | -0.016420 |
| 42               | 6                | 0              | 7.250173                | 0.732347  | -0.006052 |

|    |    |   |            |           |           |
|----|----|---|------------|-----------|-----------|
| 43 | 6  | 0 | 5.494570   | -2.474515 | 0.043872  |
| 44 | 6  | 0 | 7.248470   | -0.732271 | 0.009519  |
| 45 | 6  | 0 | 6.508582   | 3.431000  | -0.034885 |
| 46 | 1  | 0 | 4.454433   | 2.757457  | -0.012638 |
| 47 | 6  | 0 | 8.243242   | 1.691934  | -0.024695 |
| 48 | 6  | 0 | 6.500982   | -3.428837 | 0.047744  |
| 49 | 1  | 0 | 4.448256   | -2.750045 | 0.054045  |
| 50 | 6  | 0 | 8.239493   | -1.694422 | 0.013964  |
| 51 | 6  | 0 | 7.888709   | 3.075834  | -0.038697 |
| 52 | 1  | 0 | 6.233344   | 4.478970  | -0.043428 |
| 53 | 1  | 0 | 9.286925   | 1.400987  | -0.033052 |
| 54 | 6  | 0 | 7.881684   | -3.077202 | 0.031900  |
| 55 | 1  | 0 | 6.223260   | -4.476142 | 0.058022  |
| 56 | 1  | 0 | 9.284001   | -1.406258 | 0.010038  |
| 57 | 7  | 0 | -5.014012  | 0.001343  | 0.071327  |
| 58 | 7  | 0 | 5.068303   | 0.003105  | 0.016874  |
| 59 | 6  | 0 | 8.916657   | -4.086699 | 0.034413  |
| 60 | 6  | 0 | 10.292486  | -3.934523 | -0.050037 |
| 61 | 16 | 0 | 8.506061   | -5.864531 | 0.160001  |
| 62 | 6  | 0 | 11.031459  | -5.150207 | -0.020492 |
| 63 | 1  | 0 | 10.772134  | -2.968593 | -0.139935 |
| 64 | 6  | 0 | 10.247325  | -6.269677 | 0.087567  |
| 65 | 1  | 0 | 12.111461  | -5.192223 | -0.079354 |
| 66 | 1  | 0 | 10.546537  | -7.305094 | 0.131769  |
| 67 | 6  | 0 | 8.925833   | 4.082410  | -0.057200 |
| 68 | 6  | 0 | 10.303418  | 3.925495  | -0.017036 |
| 69 | 16 | 0 | 8.517111   | 5.863150  | -0.143716 |
| 70 | 6  | 0 | 11.044675  | 5.139393  | -0.051168 |
| 71 | 1  | 0 | 10.782722  | 2.957027  | 0.041307  |
| 72 | 6  | 0 | 10.260872  | 6.262469  | -0.118559 |
| 73 | 1  | 0 | 12.126093  | 5.177807  | -0.025374 |
| 74 | 1  | 0 | 10.561859  | 7.297631  | -0.156324 |
| 75 | 6  | 0 | -8.927210  | -4.073538 | 0.009111  |
| 76 | 6  | 0 | -10.211229 | -3.996825 | 0.491460  |
| 77 | 16 | 0 | -8.648544  | -5.722544 | -0.733342 |
| 78 | 6  | 0 | -10.998694 | -5.182172 | 0.307052  |
| 79 | 1  | 0 | -10.584731 | -3.116432 | 1.000289  |
| 80 | 6  | 0 | -10.335292 | -6.198244 | -0.315767 |
| 81 | 1  | 0 | -12.025044 | -5.268675 | 0.644286  |
| 82 | 1  | 0 | -10.679907 | -7.189235 | -0.566094 |
| 83 | 6  | 0 | -8.937108  | 4.066654  | 0.138417  |
| 84 | 6  | 0 | -10.221319 | 3.971227  | 0.616896  |
| 85 | 16 | 0 | -8.662022  | 5.739459  | -0.550139 |
| 86 | 6  | 0 | -11.011695 | 5.159881  | 0.470018  |
| 87 | 1  | 0 | -10.593044 | 3.073960  | 1.096732  |
| 88 | 6  | 0 | -10.350403 | 6.197181  | -0.119154 |
| 89 | 1  | 0 | -12.038554 | 5.232831  | 0.808904  |
| 90 | 1  | 0 | -10.697335 | 7.194850  | -0.337743 |

Rotational constants (GHZ): 0.0449997 0.0107580 0.0087505  
 Requested convergence on RMS density matrix=1.00D-08 within 128 cycles.  
 Requested convergence on MAX density matrix=1.00D-06.  
 Requested convergence on energy=1.00D-06.  
 No special actions if energy rises.  
 SCF Done: E(RB3LYP) = -3702.44940052 A.U. after 7 cycles  
 Conv g = 0.6671D-08 -V/T = 2.0040

**Table S8.** Cartesian Coordinates (Å) of the Optimized Structure of **P8** at the B3LYP/6-31G Level.

| Center<br>Number | Atomic<br>Number | Atomic<br>Type | Coordinates (Angstroms) |           |           |
|------------------|------------------|----------------|-------------------------|-----------|-----------|
|                  |                  |                | X                       | Y         | Z         |
| 1                | 6                | 0              | 0.698625                | -0.992552 | 0.323951  |
| 2                | 6                | 0              | 0.824439                | -0.971160 | 1.719965  |
| 3                | 6                | 0              | 2.096282                | -0.974378 | 2.309498  |
| 4                | 6                | 0              | 3.241825                | -1.008890 | 1.502931  |
| 5                | 6                | 0              | 3.115645                | -1.027214 | 0.107366  |
| 6                | 6                | 0              | 1.844986                | -1.014868 | -0.482335 |
| 7                | 6                | 0              | -0.698961               | -0.992790 | -0.323718 |
| 8                | 6                | 0              | -1.845211               | -1.018268 | 0.482400  |
| 9                | 6                | 0              | -3.115938               | -1.030350 | -0.107324 |
| 10               | 6                | 0              | -3.241934               | -1.008736 | -1.502866 |
| 11               | 6                | 0              | -2.096311               | -0.971730 | -2.309543 |
| 12               | 6                | 0              | -0.824572               | -0.968234 | -1.719731 |
| 13               | 1                | 0              | -0.050289               | -0.951593 | 2.335696  |
| 14               | 1                | 0              | 2.192364                | -0.952013 | 3.375020  |
| 15               | 1                | 0              | 3.989954                | -1.050654 | -0.508666 |
| 16               | 1                | 0              | -3.990216               | -1.055617 | 0.508569  |
| 17               | 1                | 0              | -2.192331               | -0.947437 | -3.375128 |
| 18               | 1                | 0              | 0.050089                | -0.946504 | -2.335184 |
| 19               | 6                | 0              | 5.133067                | 0.352322  | 2.187206  |
| 20               | 6                | 0              | 5.541901                | -1.722773 | 1.225062  |
| 21               | 6                | 0              | 4.794351                | 1.340003  | 3.040781  |
| 22               | 6                | 0              | 6.099652                | 0.536682  | 1.219978  |
| 23               | 6                | 0              | 5.655204                | -3.048249 | 1.010991  |
| 24               | 6                | 0              | 6.365224                | -0.817650 | 0.591494  |
| 25               | 6                | 0              | 5.388055                | 2.606355  | 2.853501  |
| 26               | 1                | 0              | 4.092131                | 1.170984  | 3.830543  |
| 27               | 6                | 0              | 6.670334                | 1.727531  | 0.967882  |
| 28               | 6                | 0              | 6.578301                | -3.483133 | 0.037994  |
| 29               | 1                | 0              | 5.057888                | -3.748324 | 1.556969  |
| 30               | 6                | 0              | 7.235363                | -1.165183 | -0.374774 |

|    |    |   |            |           |           |
|----|----|---|------------|-----------|-----------|
| 31 | 6  | 0 | 6.312010   | 2.806433  | 1.797040  |
| 32 | 1  | 0 | 5.138216   | 3.416365  | 3.507039  |
| 33 | 1  | 0 | 7.374963   | 1.849123  | 0.171856  |
| 34 | 6  | 0 | 7.354651   | -2.535913 | -0.675942 |
| 35 | 1  | 0 | 6.690207   | -4.528074 | -0.163525 |
| 36 | 1  | 0 | 7.818809   | -0.430189 | -0.889231 |
| 37 | 6  | 0 | -5.133097  | 0.352728  | -2.186999 |
| 38 | 6  | 0 | -5.542372  | -1.722594 | -1.225535 |
| 39 | 6  | 0 | -4.793943  | 1.340498  | -3.040254 |
| 40 | 6  | 0 | -6.099662  | 0.537133  | -1.220025 |
| 41 | 6  | 0 | -5.655788  | -3.048120 | -1.011938 |
| 42 | 6  | 0 | -6.365512  | -0.817344 | -0.591735 |
| 43 | 6  | 0 | -5.387382  | 2.606960  | -2.852792 |
| 44 | 1  | 0 | -4.091477  | 1.171668  | -3.829793 |
| 45 | 6  | 0 | -6.669989  | 1.728101  | -0.967451 |
| 46 | 6  | 0 | -6.579008  | -3.483099 | -0.039007 |
| 47 | 1  | 0 | -5.058634  | -3.748185 | -1.558192 |
| 48 | 6  | 0 | -7.235484  | -1.165019 | 0.374433  |
| 49 | 6  | 0 | -6.311699  | 2.806978  | -1.796519 |
| 50 | 1  | 0 | -5.137436  | 3.417035  | -3.506219 |
| 51 | 1  | 0 | -7.374677  | 1.849378  | -0.171405 |
| 52 | 6  | 0 | -7.354937  | -2.535862 | 0.675337  |
| 53 | 1  | 0 | -6.691093  | -4.527995 | 0.162190  |
| 54 | 1  | 0 | -7.818608  | -0.430091 | 0.889160  |
| 55 | 6  | 0 | -6.927547  | 4.197172  | -1.556659 |
| 56 | 6  | 0 | -7.824683  | 4.485142  | -0.576524 |
| 57 | 16 | 0 | -6.562781  | 5.643098  | -2.512034 |
| 58 | 6  | 0 | -8.108261  | 6.007192  | -0.472687 |
| 59 | 1  | 0 | -8.274080  | 3.749043  | 0.057160  |
| 60 | 6  | 0 | -7.398190  | 6.723909  | -1.384363 |
| 61 | 1  | 0 | -8.775760  | 6.442379  | 0.241174  |
| 62 | 1  | 0 | -7.347746  | 7.792437  | -1.413706 |
| 63 | 6  | 0 | -8.328228  | -3.005793 | 1.772693  |
| 64 | 6  | 0 | -9.121814  | -2.183132 | 2.509146  |
| 65 | 16 | 0 | -8.573490  | -4.694910 | 2.245679  |
| 66 | 6  | 0 | -10.123621 | -2.973999 | 3.392431  |
| 67 | 1  | 0 | -9.070129  | -1.115079 | 2.474804  |
| 68 | 6  | 0 | -9.990806  | -4.318490 | 3.238966  |
| 69 | 1  | 0 | -10.843068 | -2.514544 | 4.037880  |
| 70 | 1  | 0 | -10.653144 | -5.047332 | 3.656693  |
| 71 | 6  | 0 | 8.328077   | -3.005981 | -1.773080 |
| 72 | 6  | 0 | 9.122100   | -2.183527 | -2.509391 |
| 73 | 16 | 0 | 8.572671   | -4.695074 | -2.246381 |
| 74 | 6  | 0 | 10.123778  | -2.974610 | -3.392551 |
| 75 | 1  | 0 | 9.070825   | -1.115420 | -2.474708 |
| 76 | 6  | 0 | 9.990533   | -4.318973 | -3.239150 |
| 77 | 1  | 0 | 10.843615  | -2.515281 | -4.037643 |
| 78 | 1  | 0 | 10.652644  | -5.048105 | -3.657096 |
| 79 | 6  | 0 | 6.928075   | 4.196566  | 1.557208  |

|    |    |   |           |           |           |
|----|----|---|-----------|-----------|-----------|
| 80 | 6  | 0 | 7.825022  | 4.484401  | 0.576902  |
| 81 | 16 | 0 | 6.563633  | 5.642582  | 2.512676  |
| 82 | 6  | 0 | 8.108903  | 6.006421  | 0.473092  |
| 83 | 1  | 0 | 8.274254  | 3.748322  | -0.056876 |
| 84 | 6  | 0 | 7.399002  | 6.723330  | 1.384959  |
| 85 | 1  | 0 | 8.776217  | 6.441573  | -0.240879 |
| 86 | 1  | 0 | 7.348635  | 7.791681  | 1.414254  |
| 87 | 6  | 0 | 1.709611  | -1.027448 | -2.016686 |
| 88 | 1  | 0 | 0.801942  | -1.523150 | -2.290666 |
| 89 | 1  | 0 | 1.690919  | -0.021763 | -2.381336 |
| 90 | 1  | 0 | 2.542639  | -1.546272 | -2.443923 |
| 91 | 6  | 0 | -1.710103 | -1.035020 | 2.016718  |
| 92 | 1  | 0 | -0.801877 | -1.530624 | 2.289339  |
| 93 | 1  | 0 | -1.692392 | -0.030388 | 2.384095  |
| 94 | 1  | 0 | -2.542541 | -1.555914 | 2.442328  |
| 95 | 7  | 0 | -4.576640 | -1.026967 | -2.118522 |
| 96 | 7  | 0 | 4.576479  | -1.027208 | 2.118280  |

-----

Rotational constants (GHZ): 0.0413703    0.0131930    0.0113712  
The electronic state of the initial guess is 1-A.  
Requested convergence on RMS density matrix=1.00D-08 within 128 cycles.  
Requested convergence on MAX density matrix=1.00D-06.  
Requested convergence on energy=1.00D-06.  
No special actions if energy rises.  
Integral accuracy reduced to 1.0D-05 until final iterations.  
Initial convergence to 1.0D-05 achieved. Increase integral accuracy.  
SCF Done: E(RB3LYP) = -3782.02533325    A.U. after 37 cycles  
Convrg = 0.4806D-08                    -V/T = 2.0031

**Table S9.** Cartesian Coordinates (Å) of the Optimized Structure of **P9** at the B3LYP/6-31G Level.

| Center<br>Number | Atomic<br>Number | Atomic<br>Type | Coordinates (Angstroms) |           |           |
|------------------|------------------|----------------|-------------------------|-----------|-----------|
|                  |                  |                | X                       | Y         | Z         |
| 1                | 6                | 0              | 5.025707                | -3.011007 | 0.433519  |
| 2                | 6                | 0              | 3.915776                | -3.412965 | 1.211041  |
| 3                | 6                | 0              | 2.991281                | -2.460600 | 1.686675  |
| 4                | 6                | 0              | 3.202234                | -1.151218 | 1.369110  |
| 5                | 6                | 0              | 4.341953                | -0.748691 | 0.678731  |
| 6                | 6                | 0              | 5.240173                | -1.642071 | 0.167726  |
| 7                | 1                | 0              | 3.773553                | -4.453840 | 1.440849  |
| 8                | 1                | 0              | 2.143151                | -2.761713 | 2.276432  |
| 9                | 1                | 0              | 6.085004                | -1.313561 | -0.410458 |
| 10               | 6                | 0              | 3.202862                | 1.141365  | 1.373754  |
| 11               | 6                | 0              | 2.992446                | 2.449066  | 1.696202  |

|    |    |   |           |           |           |
|----|----|---|-----------|-----------|-----------|
| 12 | 6  | 0 | 3.917653  | 3.403064  | 1.224771  |
| 13 | 6  | 0 | 5.027739  | 3.004085  | 0.446809  |
| 14 | 6  | 0 | 5.241093  | 1.636787  | 0.175267  |
| 15 | 6  | 0 | 4.342283  | 0.741491  | 0.682059  |
| 16 | 1  | 0 | 2.143825  | 2.748219  | 2.286279  |
| 17 | 1  | 0 | 3.774891  | 4.443162  | 1.457689  |
| 18 | 1  | 0 | 6.085489  | 1.310440  | -0.404811 |
| 19 | 6  | 0 | 1.140824  | -0.004603 | 0.811064  |
| 20 | 6  | 0 | -0.130910 | -0.004278 | 1.390160  |
| 21 | 6  | 0 | 1.270669  | -0.004193 | -0.582008 |
| 22 | 6  | 0 | -1.270687 | -0.004169 | 0.582052  |
| 23 | 1  | 0 | -0.229587 | -0.004112 | 2.461471  |
| 24 | 6  | 0 | 0.130904  | -0.004303 | -1.390109 |
| 25 | 1  | 0 | 2.246780  | -0.003800 | -1.032595 |
| 26 | 6  | 0 | -1.140841 | -0.004610 | -0.811035 |
| 27 | 1  | 0 | -2.246791 | -0.003752 | 1.032647  |
| 28 | 1  | 0 | 0.229592  | -0.004150 | -2.461412 |
| 29 | 6  | 0 | -3.202882 | 1.141352  | -1.373871 |
| 30 | 6  | 0 | -3.202257 | -1.151222 | -1.369215 |
| 31 | 6  | 0 | -2.992538 | 2.449053  | -1.696384 |
| 32 | 6  | 0 | -4.342300 | 0.741499  | -0.682187 |
| 33 | 6  | 0 | -2.991380 | -2.460605 | -1.686830 |
| 34 | 6  | 0 | -4.341970 | -0.748696 | -0.678851 |
| 35 | 6  | 0 | -3.917773 | 3.403029  | -1.224984 |
| 36 | 1  | 0 | -2.143952 | 2.748216  | -2.286502 |
| 37 | 6  | 0 | -5.241121 | 1.636770  | -0.175405 |
| 38 | 6  | 0 | -3.915907 | -3.412931 | -1.211213 |
| 39 | 1  | 0 | -2.143277 | -2.761747 | -2.276618 |
| 40 | 6  | 0 | -5.240209 | -1.642037 | -0.167866 |
| 41 | 6  | 0 | -5.027793 | 3.004068  | -0.446921 |
| 42 | 1  | 0 | -3.775082 | 4.443116  | -1.457999 |
| 43 | 1  | 0 | -6.085528 | 1.310396  | 0.404648  |
| 44 | 6  | 0 | -5.025778 | -3.010968 | -0.433620 |
| 45 | 1  | 0 | -3.773761 | -4.453801 | -1.441098 |
| 46 | 1  | 0 | -6.085048 | -1.313498 | 0.410287  |
| 47 | 6  | 0 | 5.983605  | -4.046099 | -0.105203 |
| 48 | 6  | 0 | 7.092737  | -3.785613 | -0.856679 |
| 49 | 16 | 0 | 5.804563  | -5.777813 | 0.185508  |
| 50 | 6  | 0 | 7.926181  | -5.013492 | -1.089481 |
| 51 | 1  | 0 | 7.351823  | -2.814084 | -1.234892 |
| 52 | 6  | 0 | 7.389472  | -6.116139 | -0.503191 |
| 53 | 1  | 0 | 8.843617  | -5.013706 | -1.650003 |
| 54 | 1  | 0 | 7.863677  | -7.078137 | -0.443036 |
| 55 | 6  | 0 | 5.986418  | 4.041844  | -0.088527 |
| 56 | 6  | 0 | 7.087155  | 3.786063  | -0.852620 |
| 57 | 16 | 0 | 5.797514  | 5.773610  | 0.194480  |
| 58 | 6  | 0 | 7.732578  | 5.042917  | -1.364048 |
| 59 | 1  | 0 | 7.452368  | 2.800600  | -1.075216 |
| 60 | 6  | 0 | 7.079364  | 6.159992  | -0.949018 |



|    |    |   |           |           |           |
|----|----|---|-----------|-----------|-----------|
| 61 | 1  | 0 | 8.606102  | 5.052024  | -1.990752 |
| 62 | 1  | 0 | 7.292507  | 7.160167  | -1.277829 |
| 63 | 6  | 0 | -5.983625 | -4.046063 | 0.105229  |
| 64 | 6  | 0 | -7.092614 | -3.785606 | 0.856917  |
| 65 | 16 | 0 | -5.804642 | -5.777760 | -0.185604 |
| 66 | 6  | 0 | -7.925970 | -5.013520 | 1.089895  |
| 67 | 1  | 0 | -7.351658 | -2.814080 | 1.235187  |
| 68 | 6  | 0 | -7.389374 | -6.116137 | 0.503458  |
| 69 | 1  | 0 | -8.843273 | -5.013773 | 1.650634  |
| 70 | 1  | 0 | -7.863559 | -7.078147 | 0.443398  |
| 71 | 6  | 0 | -5.986414 | 4.041842  | 0.088556  |
| 72 | 6  | 0 | -7.087006 | 3.786079  | 0.852855  |
| 73 | 16 | 0 | -5.797583 | 5.773603  | -0.194522 |
| 74 | 6  | 0 | -7.732319 | 5.042947  | 1.364415  |
| 75 | 1  | 0 | -7.452192 | 2.800624  | 1.075522  |
| 76 | 6  | 0 | -7.079195 | 6.160014  | 0.949235  |
| 77 | 1  | 0 | -8.605708 | 5.052063  | 1.991307  |
| 78 | 1  | 0 | -7.292264 | 7.160195  | 1.278080  |
| 79 | 7  | 0 | 2.323207  | -0.005599 | 1.684437  |
| 80 | 7  | 0 | -2.323183 | -0.005614 | -1.684496 |

-----

Rotational constants (GHZ): 0.0443101    0.0241892    0.0163447

The electronic state of the initial guess is 1-A.

Requested convergence on RMS density matrix=1.00D-08 within 128 cycles.

Requested convergence on MAX density matrix=1.00D-06.

Requested convergence on energy=1.00D-06.

No special actions if energy rises.

Integral accuracy reduced to 1.0D-05 until final iterations.

Initial convergence to 1.0D-05 achieved. Increase integral accuracy.

SCF Done: E(RB3LYP) = -3472.48780067 A.U. after 82 cycles

Conv = 0.3483D-08            -V/T = 2.0032
